# Supplementary material
Source: publisher site journal article supplement (https://en-cdn.bio-protocol.org/attached/file/20190513/3242%20Supplementary%20file%20luciferin%20analysis.xlsx)
Supplement: Supplementary file 1 [file 3242%20Supplementary%20file%20luciferin%20analysis.xlsx]

## Sheet: ANALYSIS
STEP 1	For each condition, compute mean normalized signal (see other sheets in this file for examples)											STEP 2	compute difference between +luc and -luc conditions							STEP 3	compute average change in signal and
													for each concentration of ATP								plot data and obtain line of best fit
- luciferase (-luc)						+ luciferase (+luc)						difference
time (s)	0.1 uM ATP	1 uM ATP	10 uM ATP	100 uM ATP		time (s)	0.1 uM ATP	1 uM ATP	10 uM ATP	100 uM ATP		time (s)	e-7 ATP	e-6 ATP	e-5 ATP	e-4 ATP				log10([ATP]), Molar	|Δluc|(%)
0	0.994125	0.995605	0.996466	0.999189		0	0.99254	0.995199	0.995244	0.997377		0	-0.00158443	-0.000405643	-0.00122179	-0.00181173				-7	1.36046
1.02762	0.993385	0.992924	0.991894	0.997162		1.02762	0.994788	0.991496	0.995501	0.996459		1.02762	0.0014022	-0.00142833	0.00360699	-0.000702901				-6	2.18539
2.05686	0.995312	0.99267	0.994373	0.994712		2.05686	0.995815	0.995263	0.995803	0.996723		2.05686	0.000502945	0.00259347	0.00142997	0.00201098				-5	3.97169
3.07997	0.994347	0.995768	0.996044	0.992987		3.07997	0.993741	0.995836	0.992687	0.993569		3.07997	-0.000606468	6.75005e-05	-0.0033578	0.000582528				-4	6.88109
4.01175	0.995257	0.996549	0.993779	0.994029		4.01175	0.995764	0.996726	0.991888	0.993132		4.01175	0.000507541	0.000177001	-0.00189171	-0.000896673
5.03997	0.99482	0.991789	0.992049	0.996919		5.03997	0.994605	0.996913	0.99185	0.996402		5.03997	-0.000214974	0.00512402	-0.000198895	-0.000516958
6.06525	0.99404	0.992351	0.992164	0.99668		6.06525	0.993395	0.996269	0.991587	0.997732		6.06525	-0.000644992	0.0039174	-0.000576768	0.00105216
7.08962	0.995227	0.99317	0.991723	0.992249		7.08962	0.99462	0.995679	0.989881	0.995387		7.08962	-0.00060757	0.00250944	-0.00184204	0.00313822
8.01219	0.996418	0.995763	0.992605	0.994383		8.01219	0.999146	0.992453	0.989195	0.994147		8.01219	0.0027278	-0.00330974	-0.00341067	-0.000236073
9.04098	0.994819	0.997541	0.998598	0.997317		9.04098	0.993298	0.992126	0.990752	0.997958		9.04098	-0.00152144	-0.00541482	-0.00784608	0.000641693
10.0677	0.994095	0.99471	0.993207	0.99623		10.0677	0.991688	0.993498	0.988371	0.995145		10.0677	-0.00240652	-0.00121203	-0.0048353	-0.00108468
11.0905	0.995956	0.995301	0.995361	0.993906		11.0905	0.993734	0.992559	0.988807	0.994483		11.0905	-0.00222173	-0.00274158	-0.00655406	0.000577061
12.0118	0.993148	0.995948	0.991601	0.994459		12.0118	0.990965	0.990759	0.98799	0.994211		12.0118	-0.0021832	-0.00518821	-0.00361113	-0.000247634
13.0362	0.991989	0.992339	0.993841	0.992334		13.0362	0.992722	0.990179	0.986312	0.995611		13.0362	0.000733478	-0.00215962	-0.00752947	0.00327735
14.0583	0.990804	0.993043	0.99359	0.992955		14.0583	0.992218	0.989887	0.989753	0.997609		14.0583	0.00141399	-0.00315638	-0.00383675	0.00465475
15.0817	0.987192	0.990258	0.986681	0.991941		15.0817	0.989702	0.989756	0.995046	0.996451		15.0817	0.00251055	-0.000502694	0.00836452	0.00450943
16.0118	0.989939	0.98916	0.989529	0.98761		16.0118	0.982979	0.978674	0.99359	0.972269		16.0118	-0.0069594	-0.0104856	0.00406067	-0.0153412
17.0384	0.987162	0.990713	0.99047	0.979292		17.0384	0.977104	0.975661	0.982588	0.938392		17.0384	-0.0100583	-0.0150521	-0.00788243	-0.0409005
18.0672	0.986186	0.989415	0.990676	0.974202		18.0672	0.974119	0.973399	0.968903	0.912536		18.0672	-0.0120663	-0.0160156	-0.0217729	-0.0616658
19.0915	0.983942	0.987609	0.989638	0.966765		19.0915	0.973995	0.973765	0.962404	0.901641		19.0915	-0.00994606	-0.0138447	-0.0272338	-0.065124
20.0117	0.984946	0.987966	0.991892	0.962994		20.0117	0.970189	0.969514	0.956693	0.896087		20.0117	-0.0147577	-0.0184525	-0.0351998	-0.066907
21.0404	0.985836	0.989381	0.992397	0.960396		21.0404	0.970988	0.968482	0.95662	0.888365		21.0404	-0.0148476	-0.0208993	-0.0357777	-0.0720316
22.0689	0.986033	0.988483	0.988821	0.95729		22.0689	0.967735	0.966044	0.951324	0.885889		22.0689	-0.0182981	-0.0224393	-0.0374971	-0.0714005
23.0924	0.986071	0.986275	0.988489	0.954113		23.0924	0.966749	0.964845	0.94687	0.884175		23.0924	-0.0193215	-0.0214293	-0.0416186	-0.069938
24.0176	0.982712	0.986257	0.988144	0.953393		24.0176	0.967103	0.963648	0.943583	0.88121		24.0176	-0.0156088	-0.0226084	-0.0445615	-0.0721832
25.0428	0.980107	0.984855	0.985461	0.949806		25.0428	0.966278	0.962013	0.942959	0.880294		25.0428	-0.0138288	-0.0228414	-0.0425023	-0.0695123
26.0722	0.983815	0.984363	0.985606	0.950844		26.0722	0.964166	0.9612	0.944175	0.879166		26.0722	-0.0196485	-0.0231636	-0.0414314	-0.0716779
27.0117	0.984104	0.983136	0.986784	0.947995		27.0117	0.966152	0.960928	0.94177	0.877973		27.0117	-0.0179524	-0.0222081	-0.0450143	-0.0700225
28.0117	0.981251	0.984575	0.98874	0.946316		28.0117	0.967307	0.960445	0.942409	0.877505		28.0117	-0.013944	-0.0241302	-0.0463307	-0.068811
29.0117	0.979429	0.983168	0.985466	0.945173		29.0117	0.967902	0.960382	0.941659	0.877336		29.0117	-0.011526	-0.0227853	-0.0438073	-0.0678372
30.0117	0.980112	0.983754	0.984318	0.945719		30.0117	0.968729	0.961305	0.943	0.876054		30.0117	-0.0113831	-0.0224489	-0.0413177	-0.0696649
31.0117	0.980357	0.980933	0.984673	0.945199		31.0117	0.967743	0.959681	0.941932	0.875524		31.0117	-0.0126146	-0.021252	-0.0427406	-0.0696755
32.0117	0.981603	0.982453	0.983348	0.944625		32.0117	0.967949	0.961503	0.942586	0.876252		32.0117	-0.0136545	-0.0209502	-0.0407613	-0.0683728
33.0117	0.980839	0.982487	0.982852	0.942277		33.0117	0.967215	0.961238	0.946568	0.875993		33.0117	-0.0136237	-0.0212487	-0.0362836	-0.0662837
34.0117	0.981484	0.982922	0.981018	0.942071		34.0117	0.969461	0.961441	0.945453	0.873636		34.0117	-0.0120226	-0.0214812	-0.0355655	-0.0684353
35.0117	0.9792	0.980929	0.983314	0.937916		35.0117	0.969186	0.96057	0.945004	0.872667		35.0117	-0.0100148	-0.0203589	-0.0383105	-0.065249
36.0117	0.978184	0.983672	0.980547	0.93615		36.0117	0.969899	0.959984	0.945281	0.869636		36.0117	-0.00828427	-0.0236877	-0.0352663	-0.0665135
37.0067	0.978739	0.983465	0.983025	0.936395		37.0067	0.969646	0.960541	0.943204	0.867753		37.0067	-0.00909273	-0.0229238	-0.0398204	-0.0686422
38.0117	0.980506	0.982063	0.982878	0.933042		38.0117	0.969284	0.958244	0.945773	0.865884		38.0117	-0.0112219	-0.0238188	-0.037105	-0.0671584
39.0117	0.980167	0.977647	0.984449	0.931247		39.0117	0.968987	0.960757	0.948766	0.865685		39.0117	-0.0111801	-0.0168898	-0.0356827	-0.0655626
40.0117	0.983752	0.98092	0.982511	0.931334		40.0117	0.970881	0.958006	0.945049	0.862184		40.0117	-0.0128707	-0.0229142	-0.0374612	-0.06915
41.0117	0.980256	0.97928	0.981718	0.928546		41.0117	0.969398	0.957444	0.945039	0.864206		41.0117	-0.0108574	-0.0218361	-0.0366792	-0.0643408
42.0117	0.980223	0.977872	0.980338	0.925054		42.0117	0.971218	0.958406	0.948171	0.861001		42.0117	-0.00900437	-0.0194658	-0.0321676	-0.0640524
43.0117	0.981287	0.978186	0.978084	0.923869		43.0117	0.971156	0.957968	0.949584	0.862113		43.0117	-0.0101306	-0.0202183	-0.0284998	-0.0617566
44.0117	0.980201	0.979747	0.981111	0.921169		44.0117	0.971563	0.960293	0.947833	0.858369		44.0117	-0.00863805	-0.0194541	-0.0332786	-0.0628006
45.0117	0.979794	0.977207	0.98117	0.924095		45.0117	0.971173	0.96036	0.947456	0.857804		45.0117	-0.008621	-0.0168472	-0.0337146	-0.0662909
46.0117	0.979937	0.977782	0.983055	0.923034		46.0117	0.973979	0.962226	0.949064	0.858009		46.0117	-0.00595755	-0.0155558	-0.0339917	-0.0650247
47.0117	0.979533	0.978766	0.984201	0.920417		47.0117	0.972767	0.961428	0.950995	0.857729		47.0117	-0.00676622	-0.0173384	-0.0332066	-0.0626881
48.0117	0.979912	0.978541	0.982489	0.917843		48.0117	0.972128	0.958537	0.950264	0.855454		48.0117	-0.00778362	-0.0200033	-0.0322247	-0.0623883
49.0117	0.97839	0.979908	0.980572	0.91335		49.0117	0.975059	0.962019	0.951861	0.855844		49.0117	-0.00333106	-0.0178886	-0.0287117	-0.0575059
50.0117	0.979066	0.981561	0.98047	0.912085		50.0117	0.971288	0.960948	0.951104	0.854603		50.0117	-0.00777794	-0.0206132	-0.0293664	-0.0574823
51.0117	0.98202	0.981227	0.981931	0.911163		51.0117	0.973282	0.960385	0.955351	0.854205		51.0117	-0.00873833	-0.020842	-0.0265793	-0.0569581
52.0117	0.982439	0.980663	0.982732	0.907217		52.0117	0.972909	0.963327	0.954297	0.847832		52.0117	-0.00953007	-0.0173359	-0.0284353	-0.0593851
53.0107	0.982616	0.978676	0.981146	0.907147		53.0107	0.973275	0.963886	0.954172	0.84857		53.0107	-0.009341	-0.0147891	-0.0269738	-0.0585762
54.0107	0.981095	0.978309	0.979518	0.910167		54.0107	0.972389	0.959707	0.952728	0.84963		54.0107	-0.00870597	-0.0186027	-0.0267895	-0.0605369
55.0117	0.981183	0.979076	0.981453	0.909851		55.0117	0.970778	0.963479	0.952051	0.847659		55.0117	-0.0104055	-0.0155972	-0.0294026	-0.0621921
56.0117	0.978798	0.977851	0.98105	0.905446		56.0117	0.973163	0.961829	0.953377	0.843975		56.0117	-0.00563489	-0.0160224	-0.0276731	-0.0614707
57.0118	0.979904	0.979404	0.982794	0.903953		57.0118	0.97513	0.960384	0.951636	0.843128		57.0118	-0.00477426	-0.0190204	-0.0311582	-0.0608255
58.0117	0.980183	0.979194	0.978548	0.902039		58.0117	0.973094	0.958474	0.950144	0.843851		58.0117	-0.00708841	-0.0207206	-0.0284045	-0.0581876
59.0117	0.98007	0.979692	0.980566	0.900623		59.0117	0.973408	0.960744	0.954015	0.842895		59.0117	-0.00666174	-0.0189471	-0.0265518	-0.0577287
60.0117	0.98043	0.979849	0.981857	0.898308		60.0117	0.972962	0.961434	0.953322	0.840483		60.0117	-0.00746822	-0.0184148	-0.0285354	-0.0578249
61.0117	0.98027	0.981186	0.981719	0.898448		61.0117	0.976222	0.962849	0.953459	0.841298		61.0117	-0.00404757	-0.0183376	-0.0282592	-0.0571505
62.0117	0.980708	0.981702	0.982166	0.89655		62.0117	0.975037	0.960375	0.956729	0.843037		62.0117	-0.00567153	-0.0213274	-0.0254371	-0.0535136
63.0117	0.980613	0.979215	0.979454	0.893138		63.0117	0.97431	0.962762	0.952667	0.838654		63.0117	-0.00630338	-0.0164527	-0.0267868	-0.0544847
64.0117	0.981813	0.980058	0.978108	0.893387		64.0117	0.975782	0.962757	0.954991	0.837086		64.0117	-0.00603113	-0.0173005	-0.0231166	-0.0563002
65.0107	0.983038	0.978755	0.980247	0.890819		65.0107	0.976143	0.961167	0.952494	0.835143		65.0107	-0.00689486	-0.0175873	-0.0277535	-0.0556764
66.0117	0.982517	0.977252	0.982148	0.891186		66.0117	0.976809	0.962401	0.955465	0.834552		66.0117	-0.00570859	-0.0148503	-0.0266836	-0.0566337
67.0117	0.980518	0.978927	0.980105	0.889096		67.0117	0.976182	0.96306	0.953717	0.833257		67.0117	-0.00433591	-0.0158676	-0.0263874	-0.0558384
68.0117	0.978741	0.979445	0.978293	0.8862		68.0117	0.975358	0.962513	0.950899	0.835655		68.0117	-0.00338305	-0.0169315	-0.0273941	-0.050545
69.0117	0.976466	0.977008	0.978815	0.886463		69.0117	0.975868	0.959984	0.955524	0.836089		69.0117	-0.000597413	-0.0170239	-0.0232912	-0.0503744
70.0067	0.977087	0.977101	0.975719	0.885735		70.0067	0.973272	0.962544	0.955654	0.834445		70.0067	-0.00381556	-0.0145561	-0.0200648	-0.0512898
71.0117	0.977289	0.977404	0.979573	0.885047		71.0117	0.973371	0.961731	0.952291	0.833786		71.0117	-0.00391803	-0.015673	-0.0272817	-0.0512608
72.0118	0.979289	0.976995	0.976824	0.88434		72.0118	0.977406	0.961819	0.95144	0.833369		72.0118	-0.0018828	-0.0151759	-0.025384	-0.0509711
73.0117	0.979878	0.976694	0.976338	0.881751		73.0117	0.974498	0.962131	0.955294	0.83067		73.0117	-0.00537996	-0.0145628	-0.0210437	-0.0510812
74.0117	0.979413	0.977444	0.976551	0.88488		74.0117	0.974502	0.964568	0.954935	0.830914		74.0117	-0.00491092	-0.0128766	-0.021616	-0.0539658
75.0117	0.98009	0.974649	0.977268	0.882561		75.0117	0.975008	0.965758	0.957087	0.828623		75.0117	-0.00508187	-0.00889118	-0.0201806	-0.0539374
76.0117	0.979934	0.977243	0.979248	0.879356		76.0117	0.975217	0.96332	0.953633	0.827789		76.0117	-0.00471724	-0.0139231	-0.0256146	-0.0515668
77.0117	0.978245	0.97724	0.979742	0.877751		77.0117	0.976508	0.963072	0.957927	0.825538		77.0117	-0.00173765	-0.0141683	-0.0218152	-0.0522135
78.0067	0.978777	0.978292	0.979838	0.87801		78.0067	0.977482	0.964867	0.958062	0.823253		78.0067	-0.00129502	-0.0134248	-0.0217769	-0.0547565
79.0117	0.979802	0.978618	0.982152	0.876413		79.0117	0.977289	0.964887	0.957616	0.820835		79.0117	-0.00251342	-0.0137307	-0.0245354	-0.0555787
80.0117	0.980182	0.978822	0.978586	0.875958		80.0117	0.97739	0.965217	0.95402	0.821853		80.0117	-0.00279163	-0.0136051	-0.024566	-0.0541049
81.0057	0.981206	0.978178	0.976752	0.875024		81.0057	0.97595	0.961697	0.956545	0.821163		81.0057	-0.00525546	-0.0164812	-0.0202071	-0.0538607
82.0117	0.976443	0.976523	0.978974	0.87575		82.0117	0.977085	0.962637	0.958218	0.821989		82.0117	0.000642172	-0.0138859	-0.0207566	-0.0537617
83.0117	0.977514	0.976085	0.977415	0.874864		83.0117	0.975878	0.964527	0.958052	0.820687		83.0117	-0.00163646	-0.0115581	-0.0193626	-0.0541768
84.0117	0.97801	0.974372	0.979506	0.874862		84.0117	0.975298	0.96462	0.959355	0.819195		84.0117	-0.00271147	-0.0097522	-0.0201513	-0.0556666
85.0117	0.977517	0.977183	0.979013	0.87202		85.0117	0.976838	0.964872	0.956502	0.81833		85.0117	-0.000678912	-0.0123114	-0.0225108	-0.0536898
86.0117	0.976629	0.978288	0.980669	0.872367		86.0117	0.972735	0.963306	0.954545	0.816601		86.0117	-0.0038944	-0.0149813	-0.0261241	-0.0557655
87.0117	0.979023	0.976708	0.976155	0.873277		87.0117	0.969798	0.963546	0.955403	0.81564		87.0117	-0.00922489	-0.0131615	-0.0207528	-0.0576368
88.0117	0.974886	0.975189	0.976145	0.871913		88.0117	0.973094	0.960391	0.953155	0.817894		88.0117	-0.00179231	-0.0147981	-0.022989	-0.054019
89.0117	0.975892	0.978412	0.977688	0.871981		89.0117	0.97281	0.964329	0.957618	0.814241		89.0117	-0.00308216	-0.0140829	-0.0200696	-0.0577392
90.0117	0.976413	0.974837	0.976895	0.871913		90.0117	0.970186	0.9626	0.959375	0.811438		90.0117	-0.0062272	-0.0122376	-0.0175206	-0.0604755
91.0117	0.979864	0.976623	0.975477	0.870072		91.0117	0.972646	0.963484	0.957968	0.81017		91.0117	-0.00721803	-0.0131389	-0.0175089	-0.0599024
92.0118	0.975364	0.97495	0.975472	0.869991		92.0118	0.97193	0.964468	0.959339	0.812028		92.0118	-0.0034343	-0.0104828	-0.0161326	-0.0579632
93.0117	0.975685	0.975211	0.975742	0.867458		93.0117	0.971429	0.962728	0.956836	0.811558		93.0117	-0.00425589	-0.012483	-0.0189054	-0.0559
94.0117	0.976145	0.974212	0.975359	0.864134		94.0117	0.969125	0.963624	0.960499	0.809895		94.0117	-0.00702072	-0.0105881	-0.0148598	-0.0542393
95.0117	0.976136	0.975474	0.972435	0.862945		95.0117	0.970659	0.96484	0.959739	0.808711		95.0117	-0.00547714	-0.0106339	-0.0126965	-0.0542341
96.0117	0.974446	0.974611	0.976442	0.862123		96.0117	0.973977	0.962996	0.962357	0.806212		96.0117	-0.00046918	-0.0116149	-0.014085	-0.0559113
97.0117	0.974033	0.978513	0.977115	0.863923		97.0117	0.976427	0.962967	0.963445	0.807636		97.0117	0.00239403	-0.0155456	-0.0136695	-0.0562877
98.0117	0.975738	0.978033	0.974902	0.863353		98.0117	0.973439	0.964053	0.961428	0.805591		98.0117	-0.00229922	-0.0139805	-0.0134735	-0.0577619
99.0117	0.977123	0.975285	0.975558	0.861703		99.0117	0.971631	0.964447	0.962412	0.80538		99.0117	-0.00549234	-0.010838	-0.0131454	-0.0563236
100.012	0.976696	0.974026	0.973895	0.861354		100.012	0.973947	0.961349	0.960378	0.80223		100.012	-0.00274936	-0.0126772	-0.0135173	-0.059123
101.065	0.975709	0.970914	0.975888	0.859708		101.065	0.972277	0.960768	0.959899	0.803494		101.065	-0.00343251	-0.010146	-0.0159894	-0.0562139
102.087	0.974286	0.973968	0.973387	0.860435		102.087	0.973978	0.9618	0.959117	0.801869		102.087	-0.000307518	-0.0121682	-0.0142698	-0.058565
103.012	0.974001	0.973586	0.972786	0.857905		103.012	0.974182	0.964092	0.961213	0.801606		103.012	0.000181966	-0.00949427	-0.0115733	-0.0562992
104.037	0.973256	0.973464	0.9722	0.85779		104.037	0.974344	0.960352	0.960859	0.804093		104.037	0.0010873	-0.0131118	-0.0113406	-0.0536964
105.065	0.970571	0.970675	0.971666	0.858523		105.065	0.968377	0.960964	0.962428	0.802966		105.065	-0.00219406	-0.00971081	-0.00923728	-0.0555573
106.088	0.971914	0.972447	0.976248	0.856726		106.088	0.967638	0.959083	0.959815	0.802508		106.088	-0.00427601	-0.0133634	-0.0164337	-0.0542185
107.012	0.973356	0.973131	0.973996	0.854895		107.012	0.969362	0.959725	0.960034	0.800279		107.012	-0.00399308	-0.0134056	-0.0139616	-0.0546155
108.039	0.972662	0.972822	0.97633	0.855025		108.039	0.967829	0.95882	0.959672	0.800936		108.039	-0.00483329	-0.0140022	-0.0166578	-0.0540884
109.067	0.971258	0.974525	0.973835	0.85447		109.067	0.967582	0.959546	0.960551	0.797918		109.067	-0.00367594	-0.0149787	-0.0132848	-0.0565522
110.085	0.969865	0.973202	0.973593	0.852165		110.085	0.967724	0.958905	0.956781	0.795286		110.085	-0.00214091	-0.0142962	-0.0168118	-0.0568791
111.012	0.970703	0.972809	0.971697	0.850724		111.012	0.969688	0.955776	0.9575	0.798209		111.012	-0.00101536	-0.0170334	-0.0141968	-0.0525146
112.037	0.971351	0.971873	0.971943	0.852276		112.037	0.971544	0.956216	0.957638	0.79607		112.037	0.00019316	-0.0156571	-0.014305	-0.0562067
113.066	0.971306	0.972283	0.975691	0.849843		113.066	0.973345	0.958009	0.957051	0.795439		113.066	0.00203878	-0.0142743	-0.0186407	-0.0544044
114.09	0.970941	0.972646	0.972865	0.849929		114.09	0.970265	0.957207	0.957876	0.796923		114.09	-0.000676054	-0.0154397	-0.0149885	-0.0530065
115.014	0.971146	0.969672	0.974424	0.850025		115.014	0.971771	0.959181	0.959892	0.796811		115.014	0.000624737	-0.0104907	-0.0145325	-0.0532137
116.041	0.970067	0.973853	0.974325	0.849993		116.041	0.972251	0.960512	0.958028	0.793232		116.041	0.00218393	-0.0133407	-0.0162971	-0.0567611
117.069	0.970809	0.970838	0.973367	0.8486		117.069	0.969797	0.957447	0.961401	0.792637		117.069	-0.00101194	-0.013391	-0.0119662	-0.0559624
118.086	0.967831	0.972054	0.971046	0.849402		118.086	0.971875	0.958352	0.958478	0.796658		118.086	0.00404408	-0.0137016	-0.0125671	-0.0527441
119.012	0.97062	0.971893	0.973818	0.845459		119.012	0.968902	0.956993	0.958613	0.796398		119.012	-0.00171751	-0.0149004	-0.0152057	-0.0490608
120.035	0.970682	0.970002	0.969325	0.845331		120.035	0.97045	0.956769	0.957412	0.795947		120.035	-0.000232246	-0.0132325	-0.0119131	-0.0493838
121.064	0.971049	0.969912	0.973375	0.846		121.064	0.973051	0.958431	0.957136	0.793514		121.064	0.00200177	-0.0114809	-0.0162389	-0.0524856

## Sheet: 0.1 uM ATP (+luciferase)
RAW DATA							NORMALIZED
time (s)	trial 1	trial 2	trial 3	mean			time (s)	trial 1	trial 2	trial 3	mean
0	1142.95	1541.59	1351.93	1345.49			0	0.99656	0.997798	0.988773	0.994377
1.03706	1135.32	1542.99	1352.25	1343.52			1.03706	0.989901	0.998709	0.989011	0.99254
2.06636	1145.38	1532.82	1358.48	1345.56			2.06636	0.998673	0.992125	0.993566	0.994788
3.08979	1144.37	1544.99	1353.13	1347.5			3.08979	0.99779	1	0.989656	0.995815
4.01438	1146.9	1528.71	1356.01	1343.87			4.01438	1	0.989459	0.991763	0.993741
5.0409	1145.12	1534.41	1361.38	1346.97			5.0409	0.998448	0.993152	0.995692	0.995764
6.07108	1138.36	1543.95	1356.24	1346.19			6.07108	0.992554	0.999328	0.991933	0.994605
7.09554	1138.81	1538.29	1355.75	1344.29			7.09554	0.992951	0.995665	0.991571	0.993395
8.02027	1138.69	1537.48	1361.63	1345.94			8.02027	0.992844	0.995141	0.995875	0.99462
9.04655	1146.42	1543.36	1365.79	1351.86			9.04655	0.999581	0.998947	0.99891	0.999146
10.0758	1136.26	1539.21	1357.58	1344.35			10.0758	0.990723	0.99626	0.992909	0.993298
11.0984	1141.77	1530.86	1351.81	1341.48			11.0984	0.995525	0.990853	0.988687	0.991688
12.023	1138.61	1543.67	1352.63	1344.97			12.023	0.992767	0.999144	0.989291	0.993734
13.0494	1136.59	1533.68	1352.52	1340.93			13.0494	0.991008	0.992678	0.989208	0.990965
14.078	1133.32	1539.38	1358.57	1343.76			14.078	0.988159	0.996372	0.993635	0.992722
15.0134	1132.6	1535.42	1360.88	1342.96			15.0134	0.987527	0.993809	0.995319	0.992218
16.0374	1119.7	1533.9	1367.27	1340.29			16.0374	0.976282	0.992825	1	0.989702
17.0635	1118.38	1522.61	1351.26	1330.75			17.0635	0.975133	0.985516	0.988289	0.982979
18.0916	1113.38	1506.52	1347.37	1322.42			18.0916	0.970771	0.975099	0.985442	0.977104
19.0173	1119.58	1489.98	1342.38	1317.31			19.0173	0.976175	0.964395	0.981789	0.974119
20.0408	1125.38	1487.96	1336.74	1316.69			20.0408	0.981232	0.963087	0.977667	0.973995
21.066	1123.94	1483.52	1326.76	1311.41			21.066	0.979983	0.960213	0.97037	0.970189
22.0918	1123.89	1485.56	1328.3	1312.58			22.0918	0.979937	0.961534	0.971494	0.970988
23.0183	1120.77	1481.72	1322.07	1308.19			23.0183	0.977219	0.95905	0.966936	0.967735
24.0427	1122.63	1472.11	1324.32	1306.35			24.0427	0.978836	0.952831	0.96858	0.966749
25.0113	1121.58	1477.99	1321.81	1307.13			25.0113	0.977923	0.956637	0.966748	0.967103
26.0113	1123.05	1474.53	1319.73	1305.77			26.0113	0.979209	0.954398	0.965226	0.966278
27.0113	1123.26	1476.21	1309.35	1302.94			27.0113	0.979388	0.95548	0.957631	0.964166
28.0113	1124.64	1478.82	1313.53	1305.66			28.0113	0.980591	0.957173	0.960692	0.966152
29.0113	1127.31	1480.46	1313.64	1307.14			29.0113	0.982917	0.958234	0.960771	0.967307
30.0113	1126.46	1480.08	1317.42	1307.99			30.0113	0.98218	0.957988	0.963539	0.967902
31.0113	1120.11	1490.99	1318.73	1309.94			31.0113	0.976641	0.96505	0.964495	0.968729
32.0113	1121.31	1485.43	1318.18	1308.31			32.0113	0.977683	0.96145	0.964095	0.967743
33.0113	1118.16	1486.49	1321.85	1308.83			33.0113	0.974939	0.962132	0.966775	0.967949
34.0113	1125.41	1473.43	1321.75	1306.86			34.0113	0.981267	0.953679	0.9667	0.967215
35.0113	1129.76	1480.8	1319.26	1309.94			35.0113	0.985051	0.958451	0.964881	0.969461
36.0113	1128.8	1478.76	1321.08	1309.54			36.0113	0.984214	0.957132	0.96621	0.969186
37.0113	1126.88	1485.68	1320.17	1310.91			37.0113	0.98254	0.961611	0.965546	0.969899
38.0113	1125.98	1484.91	1320.88	1310.59			38.0113	0.981755	0.961111	0.966071	0.969646
39.0113	1128.51	1483.61	1317.53	1309.88			39.0113	0.983961	0.960272	0.963619	0.969284
40.0114	1127.63	1485.19	1315.95	1309.59			40.0114	0.9832	0.961296	0.962465	0.968987
41.0113	1127.29	1485.36	1323.98	1312.21			41.0113	0.9829	0.961406	0.968338	0.970881
42.0113	1121.53	1491.11	1319.68	1310.77			42.0113	0.977875	0.965126	0.965194	0.969398
43.0113	1120.56	1494.9	1324.95	1313.47			43.0113	0.977029	0.967577	0.969048	0.971218
44.0113	1118.83	1499.1	1323.04	1313.66			44.0113	0.975528	0.970296	0.967645	0.971156
45.0113	1123.17	1493.53	1324.47	1313.72			45.0113	0.979309	0.966689	0.968691	0.971563
46.0113	1124.81	1494.58	1319.98	1313.12			46.0113	0.980737	0.967374	0.965407	0.971173
47.0114	1124.81	1502.81	1324.21	1317.27			47.0114	0.980742	0.972697	0.968499	0.973979
48.0113	1129.06	1495.04	1321.04	1315.05			48.0113	0.984443	0.967673	0.966185	0.972767
49.0113	1126.67	1494.78	1321.5	1314.32			49.0113	0.982361	0.9675	0.966523	0.972128
50.0113	1129.15	1501.09	1324.97	1318.41			50.0113	0.984528	0.971587	0.969061	0.975059
51.0113	1126.25	1494.48	1318.82	1313.18			51.0113	0.981997	0.967307	0.964559	0.971288
52.0113	1123.8	1497.87	1326.92	1316.2			52.0113	0.979859	0.969503	0.970483	0.973282
53.0113	1120.79	1496.67	1330.04	1315.83			53.0113	0.977234	0.968725	0.972767	0.972909
54.0113	1121.7	1498.19	1329.11	1316.33			54.0113	0.978032	0.969707	0.972087	0.973275
55.0113	1122.74	1489.66	1331.78	1314.73			55.0113	0.978935	0.964191	0.974041	0.972389
56.0113	1122.23	1491.6	1324.06	1312.63			56.0113	0.978494	0.965443	0.968395	0.970778
57.0113	1129.88	1498.5	1318.62	1315.67			57.0113	0.985162	0.969911	0.964416	0.973163
58.0113	1126.08	1502.83	1327.4	1318.77			58.0113	0.981842	0.97271	0.970836	0.97513
59.0113	1122.63	1500.96	1324.81	1316.13			59.0113	0.978839	0.971505	0.96894	0.973094
60.0113	1126.21	1495.7	1326.49	1316.13			60.0113	0.981958	0.968098	0.970169	0.973408
61.0113	1124.83	1500.13	1322.38	1315.78			61.0113	0.980757	0.970964	0.967165	0.972962
62.0113	1125.84	1503.16	1331.87	1320.29			62.0113	0.981637	0.972927	0.974102	0.976222
63.0113	1127.76	1501.49	1326.2	1318.48			63.0113	0.983307	0.971846	0.969957	0.975037
64.0113	1126.88	1498.15	1327.21	1317.42			64.0113	0.982546	0.969684	0.970699	0.97431
65.0113	1128.4	1503.61	1326.6	1319.54			65.0113	0.983874	0.973218	0.970253	0.975782
66.0113	1126.82	1504.1	1329.55	1320.15			66.0113	0.982488	0.973532	0.97241	0.976143
67.0113	1127.41	1505.3	1330.51	1321.07			67.0113	0.983009	0.974307	0.973111	0.976809
68.0113	1128.21	1504.56	1327.64	1320.14			68.0113	0.983702	0.97383	0.971014	0.976182
69.0113	1125.88	1504.04	1327.49	1319.14			69.0113	0.981675	0.973497	0.970904	0.975358
70.0113	1130.22	1503.64	1324.77	1319.54			70.0113	0.985454	0.973239	0.968911	0.975868
71.0114	1123.97	1501.51	1323.45	1316.31			71.0114	0.980011	0.971859	0.967945	0.973272
72.0114	1125.65	1499.13	1323.97	1316.25			72.0114	0.98147	0.970317	0.968328	0.973371
73.0113	1128.67	1509.25	1327.96	1321.96			73.0113	0.984105	0.976866	0.971248	0.977406
74.0113	1126.04	1500.06	1327.31	1317.8			74.0113	0.98181	0.970919	0.970767	0.974498
75.0113	1130.62	1501.12	1320.91	1317.55			75.0113	0.985807	0.971607	0.966093	0.974502
76.0113	1126.62	1499.9	1328.83	1318.45			76.0113	0.98232	0.970819	0.971886	0.975008
77.0113	1122.28	1504.6	1330.72	1319.2			77.0113	0.978533	0.973854	0.973263	0.975217
78.0113	1128.38	1510.98	1323.08	1320.82			78.0113	0.983854	0.97799	0.967678	0.976508
79.0123	1126.26	1509.59	1330.85	1322.23			79.0123	0.981999	0.977087	0.973359	0.977482
80.0124	1122.32	1511.5	1333.06	1322.29			80.0124	0.97857	0.978322	0.974974	0.977289
81.0113	1125.76	1507.99	1332.49	1322.08			81.0113	0.981563	0.976048	0.974559	0.97739
82.0113	1122.58	1505.45	1332.62	1320.21			82.0113	0.978791	0.974408	0.974652	0.97595
83.0113	1125.22	1504.61	1334.87	1321.56			83.0113	0.981093	0.973862	0.9763	0.977085
84.0113	1127.05	1508.32	1324.45	1319.94			84.0113	0.982688	0.976267	0.968679	0.975878
85.0113	1123.46	1506.27	1328.16	1319.3			85.0113	0.979567	0.974937	0.971392	0.975298
86.0113	1128.14	1510.25	1325.37	1321.25			86.0113	0.983647	0.977516	0.96935	0.976838
88.2822	1112.23	1511.38	1326.51	1316.71			88.2822	0.969773	0.978247	0.970183	0.972735
89.1173	1107.3	1506.25	1324.88	1312.81			89.1173	0.965474	0.974924	0.968995	0.969798
90.138	1112.84	1508.8	1329.55	1317.06			90.138	0.970298	0.976578	0.972407	0.973094
91.1587	1110.87	1508.97	1330.58	1316.8			91.1587	0.968583	0.976686	0.97316	0.97281
92.1867	1112.28	1493.75	1331.6	1312.54			92.1867	0.969816	0.966832	0.97391	0.970186
93.1134	1113.14	1505.83	1329.98	1316.32			93.1134	0.970562	0.974655	0.972721	0.972646
94.137	1120.51	1495.51	1327.39	1314.47			94.137	0.976986	0.967972	0.970831	0.97193
95.1546	1118.82	1496.55	1326.43	1313.93			95.1546	0.975514	0.968645	0.970127	0.971429
96.1831	1114.75	1496	1322.32	1311.02			96.1831	0.971966	0.968288	0.967121	0.969125
97.1173	1115.03	1501.18	1323.69	1313.3			97.1173	0.972214	0.971642	0.968121	0.970659
98.14	1119.53	1503.7	1329.7	1317.64			98.14	0.97614	0.973273	0.972518	0.973977
99.1679	1125.05	1508.63	1328.82	1320.83			99.1679	0.980944	0.976466	0.971871	0.976427
100.192	1123.57	1495.82	1329.66	1316.35			100.192	0.979658	0.968171	0.972487	0.973439
101.117	1120.73	1492.33	1328.71	1313.92			101.117	0.977182	0.965912	0.971798	0.971631
102.141	1122.33	1496.17	1332.91	1317.13			102.141	0.978575	0.968401	0.974864	0.973947
103.17	1121	1497.62	1326.36	1314.99			103.17	0.977415	0.969343	0.970072	0.972277
104.198	1119.22	1500.65	1332.78	1317.55			104.198	0.975865	0.971302	0.974767	0.973978
105.126	1118.01	1497.69	1337.68	1317.79			105.126	0.974806	0.969385	0.978357	0.974182
106.149	1116.9	1498.94	1338.55	1318.13			106.149	0.973843	0.970197	0.978991	0.974344
107.177	1120.93	1499.21	1309.03	1309.73			107.177	0.977361	0.97037	0.957399	0.968377
108.2	1120.23	1495.78	1309.87	1308.63			108.2	0.97675	0.968147	0.958017	0.967638
109.126	1121.56	1502.98	1309	1311.18			109.126	0.977901	0.972807	0.957379	0.969362
110.15	1117.24	1498.44	1311.87	1309.18			110.15	0.974141	0.96987	0.959476	0.967829
111.175	1118.8	1495.18	1311.88	1308.62			111.175	0.975495	0.967764	0.959487	0.967582
112.204	1122.23	1489.07	1313.78	1308.36			112.204	0.978494	0.963806	0.960871	0.967724
113.13	1119.99	1499.94	1314.89	1311.61			113.13	0.976535	0.97084	0.96169	0.969688
114.154	1128	1496.48	1316.02	1313.5			114.154	0.983516	0.968603	0.962513	0.971544
115.18	1125.72	1504.05	1319.42	1316.4			115.18	0.981535	0.9735	0.965	0.973345
116.118	1123.6	1499.68	1313.18	1312.15			116.118	0.979684	0.970673	0.960438	0.970265
117.147	1121.51	1499.2	1322.27	1314.33			117.147	0.977864	0.970366	0.967082	0.971771
118.17	1123.14	1493.31	1327.51	1314.65			118.17	0.979285	0.96655	0.970917	0.972251
119.191	1121.41	1498.22	1315.16	1311.6			119.191	0.977777	0.969728	0.961886	0.969797
120.117	1124.36	1492.57	1325.18	1314.04			120.117	0.980343	0.966071	0.969212	0.971875
121.14	1118.67	1496.9	1315.92	1310.5			121.14	0.975388	0.968877	0.962442	0.968902
122.166	1118.62	1495.99	1323.14	1312.58			122.166	0.97534	0.968286	0.967722	0.97045
123.192	1125.45	1499.7	1322.4	1315.85			123.192	0.981293	0.970683	0.967177	0.973051
124.118	1123.36	1497.38	1323.25	1314.67			124.118	0.979475	0.969188	0.967803	0.972155
125.147	1119.37	1494.95	1322.26	1312.2			125.147	0.975998	0.967615	0.967081	0.970231
126.17	1118.78	1493.68	1319.84	1310.76			126.17	0.975484	0.966786	0.965303	0.969191
127.197	1121.99	1494.12	1327.02	1314.38			127.197	0.978278	0.967074	0.97056	0.971971
128.122	1122.01	1488.19	1320.88	1310.36			128.122	0.978298	0.963233	0.966066	0.969199
129.151	1119.82	1486.28	1325.13	1310.41			129.151	0.976389	0.961998	0.969174	0.969187
130.169	1122.61	1496.81	1325.88	1315.1			130.169	0.978823	0.968815	0.969721	0.972453
131.196	1120.85	1493.7	1326.67	1313.74			131.196	0.977282	0.966799	0.970304	0.971462
132.121	1128.32	1493.23	1322.46	1314.67			132.121	0.9838	0.966497	0.967225	0.972507
133.143	1122.56	1490.48	1321.28	1311.44			133.143	0.978778	0.964718	0.966358	0.969951
134.168	1119.56	1490.86	1317.87	1309.43			134.168	0.976164	0.964966	0.963868	0.968333
135.194	1120.32	1497.38	1322.57	1313.42			135.194	0.976822	0.969181	0.967305	0.971103
136.121	1121	1492.76	1317.51	1310.42			136.121	0.977415	0.966196	0.963606	0.969072
137.149	1121.15	1496.38	1319.43	1312.32			137.149	0.977553	0.968534	0.965003	0.970363
138.168	1117.94	1488.72	1316.14	1307.6			138.168	0.974749	0.963576	0.962604	0.966977
139.192	1121.31	1489.48	1322.78	1311.19			139.192	0.977683	0.964069	0.967457	0.969737
140.119	1122.28	1491.01	1325.53	1312.94			140.119	0.978536	0.965061	0.969467	0.971021
141.148	1117.59	1488.96	1323.35	1309.97			141.148	0.974446	0.963734	0.967872	0.968684
142.169	1124.25	1491.13	1320.43	1311.94			142.169	0.980255	0.965139	0.965737	0.970377
143.189	1120.99	1492.95	1319.72	1311.22			143.189	0.977406	0.96632	0.965219	0.969649
144.117	1118.36	1491.31	1315.11	1308.26			144.117	0.975111	0.965255	0.961847	0.967405
145.144	1121.64	1489.62	1315.3	1308.85			145.144	0.977971	0.96416	0.961986	0.968039
146.168	1118.88	1489.3	1323.97	1310.72			146.168	0.975571	0.963956	0.968329	0.969286
147.194	1117.9	1479.39	1317.01	1304.77			147.194	0.974719	0.957539	0.963237	0.965165
148.121	1117.4	1482.61	1320.46	1306.82			148.121	0.974281	0.959623	0.965759	0.966554
149.15	1119.4	1485.03	1317.4	1307.28			149.15	0.976025	0.961189	0.963526	0.966913
150.173	1122.34	1490.01	1316.82	1309.72			150.173	0.978586	0.964414	0.963098	0.968699
151.199	1119.66	1497.63	1316.57	1311.29			151.199	0.976251	0.969348	0.962912	0.969504
152.125	1122.82	1488.78	1314.47	1308.69			152.125	0.979002	0.963618	0.961381	0.968
153.154	1120.82	1484.41	1319.09	1308.1			153.154	0.977258	0.960789	0.964755	0.967601
154.176	1122.67	1492.13	1317.48	1310.76			154.176	0.978878	0.965786	0.963579	0.969414
155.201	1121.58	1484.9	1321.66	1309.38			155.201	0.977925	0.961105	0.96664	0.968557
156.127	1121.22	1489.71	1317.93	1309.62			156.127	0.977607	0.964218	0.96391	0.968578
157.156	1122.39	1485.32	1316.68	1308.13			157.156	0.978629	0.961375	0.962994	0.967666
158.174	1117.32	1484.72	1318.76	1306.94			158.174	0.974211	0.960992	0.964519	0.966574
159.201	1119.49	1478.99	1315.78	1304.75			159.201	0.976096	0.957281	0.962336	0.965238
160.127	1119.12	1484.25	1321.98	1308.45			160.127	0.975778	0.960687	0.96687	0.967779
161.156	1114.17	1484.44	1315.68	1304.76			161.156	0.971464	0.96081	0.962263	0.964846
162.179	1119.83	1473.44	1314.42	1302.56			162.179	0.976397	0.953689	0.961345	0.96381
163.204	1117.52	1484.93	1321.34	1307.93			163.204	0.974387	0.961124	0.9664	0.967304
164.131	1116.8	1487.27	1322.26	1308.78			164.131	0.973755	0.962641	0.967075	0.967824
165.159	1119.25	1483.71	1319.57	1307.51			165.159	0.975889	0.960335	0.965111	0.967112
166.183	1120.25	1487.3	1319.72	1309.09			166.183	0.976761	0.962658	0.965221	0.968214
167.117	1113.58	1476.73	1312.65	1300.99			167.117	0.970948	0.955818	0.960048	0.962272
168.143	1114.08	1481.75	1310.92	1302.25			168.143	0.971384	0.959068	0.958785	0.963079
169.167	1118.68	1484.06	1313.03	1305.26			169.167	0.975399	0.960564	0.960326	0.96543
170.189	1119.01	1476.44	1313.11	1302.85			170.189	0.975687	0.955629	0.960381	0.963899
171.116	1117.03	1478.94	1324.03	1306.67			171.116	0.973956	0.957252	0.968368	0.966525
172.141	1120.37	1482.56	1310.06	1304.33			172.141	0.976864	0.959594	0.958152	0.96487
173.17	1119.03	1486.68	1322.98	1309.56			173.17	0.975695	0.962259	0.967603	0.968519

## Sheet: 1 uM ATP (+luciferase)
RAW DATA							NORMALIZED
time (s)	trial 1	trial 2	trial 3	mean			time (s)	trial 1	trial 2	trial 3	mean
0	1448.31	1263.86	1334.74	1348.97			0	0.9961	0.998777	0.993463	0.996113
1.02908	1445.37	1264.8	1332.77	1347.65			1.02908	0.994078	0.999516	0.992002	0.995199
2.05842	1437.67	1256.47	1333.8	1342.65			2.05842	0.988781	0.992941	0.992765	0.991496
3.081	1440.39	1259.26	1343.52	1347.72			3.081	0.990652	0.995138	1	0.995263
4.01149	1448.99	1262.67	1334.25	1348.64			4.01149	0.99657	0.997835	0.993102	0.995836
5.03783	1447.83	1264.99	1336.45	1349.76			5.03783	0.99577	0.999668	0.99474	0.996726
6.06722	1449.55	1261.22	1339.61	1350.13			6.06722	0.996955	0.996693	0.997092	0.996913
7.09022	1446.74	1264.96	1335.64	1349.11			7.09022	0.995022	0.99965	0.994133	0.996269
8.01336	1449.17	1265.41	1330.55	1348.38			8.01336	0.99669	1	0.990348	0.995679
9.03964	1437.87	1261.38	1332.26	1343.84			9.03964	0.988918	0.996819	0.991621	0.992453
10.0671	1442.9	1260.44	1327.3	1343.55			10.0671	0.99238	0.996074	0.987925	0.992126
11.086	1443.21	1256.65	1336.56	1345.47			11.086	0.992594	0.993081	0.99482	0.993498
12.0115	1441.3	1260.32	1330.66	1344.09			12.0115	0.991276	0.995976	0.990426	0.992559
13.0372	1435.36	1259.17	1330.1	1341.54			13.0372	0.987194	0.995075	0.990009	0.990759
14.0611	1442.16	1254.15	1326.82	1341.04			14.0611	0.991869	0.991102	0.987566	0.990179
15.0844	1437.19	1260.52	1323.47	1340.39			15.0844	0.988451	0.996136	0.985075	0.989887
16.0115	1439.07	1261.18	1320.5	1340.25			16.0115	0.989742	0.996659	0.982866	0.989756
17.0377	1451.7	1215.3	1312.87	1326.62			17.0377	0.998435	0.960398	0.977189	0.978674
18.0653	1448.24	1209.24	1310.36	1322.61			18.0653	0.99605	0.955613	0.97532	0.975661
19.0831	1451.1	1205.3	1302.78	1319.73			19.0831	0.998019	0.952501	0.969677	0.973399
20.0115	1453.98	1202.91	1304.13	1320.34			20.0115	1	0.950611	0.970683	0.973765
21.0378	1444.73	1199.21	1299.47	1314.47			21.0378	0.993642	0.947685	0.967215	0.969514
22.0664	1445.7	1197.35	1296.39	1313.15			22.0664	0.994307	0.946219	0.964921	0.968482
23.0844	1445.14	1190.27	1294.6	1310			23.0844	0.99392	0.940622	0.96359	0.966044
24.0115	1441.22	1188.16	1295.63	1308.34			24.0115	0.991221	0.938958	0.964357	0.964845
25.0379	1436.87	1186.55	1296.54	1306.65			25.0379	0.988232	0.937678	0.965034	0.963648
26.0664	1434.5	1181.77	1297.22	1304.49			26.0664	0.986601	0.933905	0.965535	0.962013
27.0893	1430.6	1182.08	1297.21	1303.3			27.0893	0.983918	0.93415	0.965531	0.9612
28.0115	1434.33	1176.14	1298.98	1303.15			28.0115	0.986482	0.929452	0.96685	0.960928
29.0375	1436.91	1177	1293.73	1302.55			29.0375	0.988258	0.930135	0.962942	0.960445
30.0662	1428.7	1182.24	1295.51	1302.15			30.0662	0.982613	0.934272	0.964262	0.960382
31.0908	1434.62	1182.48	1293.49	1303.53			31.0908	0.986687	0.934466	0.962764	0.961305
32.0142	1430.22	1181.83	1291.69	1301.25			32.0142	0.983662	0.933954	0.961426	0.959681
33.0404	1434.22	1183.9	1293.15	1303.76			33.0404	0.986408	0.93559	0.962511	0.961503
34.0691	1434.16	1182.83	1293.27	1303.42			34.0691	0.98637	0.934744	0.9626	0.961238
35.0914	1433	1182.54	1295.48	1303.67			35.0914	0.985569	0.934513	0.964239	0.961441
36.0114	1430.1	1183.23	1293.91	1302.41			36.0114	0.983578	0.93506	0.963073	0.96057
37.0115	1430.84	1183.84	1290.22	1301.63			37.0115	0.984083	0.935541	0.960328	0.959984
38.0115	1429.57	1184.71	1292.71	1302.33			38.0115	0.983212	0.936232	0.96218	0.960541
39.0114	1426.47	1179.8	1291.54	1299.27			39.0114	0.981078	0.932344	0.961311	0.958244
40.0114	1431.31	1182.8	1294	1302.71			40.0114	0.984408	0.934721	0.963143	0.960757
41.0114	1429.1	1175.43	1292.78	1299.1			41.0114	0.98289	0.928896	0.962232	0.958006
42.0114	1425.48	1176.91	1292.29	1298.23			42.0114	0.980402	0.930064	0.961867	0.957444
43.0115	1428.3	1174.99	1295.6	1299.63			43.0115	0.98234	0.928549	0.964331	0.958406
44.0114	1428.48	1179.43	1288.95	1298.95			44.0114	0.982462	0.932055	0.959387	0.957968
45.0115	1429.31	1181.01	1295.88	1302.07			45.0115	0.983031	0.933302	0.964545	0.960293
46.0114	1429.95	1181.09	1295.48	1302.17			46.0114	0.983471	0.933363	0.964245	0.96036
47.0114	1433.62	1179.02	1301.8	1304.81			47.0114	0.985997	0.931731	0.968949	0.962226
48.0114	1429.03	1183.6	1297.97	1303.53			48.0114	0.98284	0.935349	0.966095	0.961428
49.0114	1426.63	1175.66	1296.97	1299.75			49.0114	0.981188	0.929074	0.96535	0.958537
50.0115	1437.92	1179.33	1296.67	1304.64			50.0115	0.988953	0.931978	0.965127	0.962019
51.0115	1434.6	1177.64	1297.21	1303.15			51.0115	0.986671	0.930639	0.965533	0.960948
52.0114	1433.67	1173.05	1300.67	1302.46			52.0114	0.986031	0.927016	0.968108	0.960385
53.0114	1438.41	1181.6	1299.08	1306.36			53.0114	0.989293	0.933766	0.966921	0.963327
54.0115	1437.42	1182.74	1301.03	1307.06			54.0115	0.988614	0.934669	0.968376	0.963886
55.0115	1425.02	1183.07	1295.3	1301.13			55.0115	0.980084	0.93493	0.964105	0.959707
56.0114	1429.59	1187.81	1301.24	1306.21			56.0114	0.983225	0.938678	0.968534	0.963479
57.0115	1431.66	1181.26	1299.63	1304.19			57.0115	0.984652	0.933502	0.967332	0.961829
58.0114	1426.29	1181.33	1298.7	1302.11			58.0114	0.980956	0.933555	0.96664	0.960384
59.0114	1422.29	1178.91	1297.27	1299.49			59.0114	0.978201	0.931649	0.965572	0.958474
60.0114	1427.56	1181.58	1298.72	1302.62			60.0114	0.981826	0.933755	0.966653	0.960744
61.0115	1435.54	1182	1293.67	1303.74			61.0115	0.987319	0.934088	0.962894	0.961434
62.0115	1436.24	1182.12	1298.6	1305.65			62.0115	0.987797	0.934181	0.966567	0.962849
63.0115	1420.67	1185.69	1299.22	1301.86			63.0115	0.977094	0.937003	0.967029	0.960375
64.0114	1430.04	1186.72	1299.1	1305.29			64.0114	0.983533	0.937814	0.966939	0.962762
65.0115	1426.34	1188.84	1300.25	1305.14			65.0115	0.980988	0.93949	0.967794	0.962757
66.0114	1425.56	1186.85	1296.67	1303.03			66.0114	0.980452	0.937917	0.965133	0.961167
67.0114	1429.43	1187.9	1296.95	1304.76			67.0114	0.983115	0.938753	0.965335	0.962401
68.0114	1428.7	1192.25	1295.66	1305.54			68.0114	0.982612	0.942187	0.964381	0.96306
69.0114	1429.56	1187.72	1297.47	1304.92			69.0114	0.983208	0.938607	0.965724	0.962513
70.0115	1418.65	1188.34	1296.7	1301.23			70.0115	0.975701	0.939099	0.965151	0.959984
71.0115	1434.7	1184.74	1296.02	1305.15			71.0115	0.986736	0.93625	0.964647	0.962544
72.0115	1434.37	1183.88	1293.95	1304.07			72.0115	0.986511	0.935574	0.963108	0.961731
73.0115	1425.64	1188.96	1296.98	1303.86			73.0115	0.980512	0.939587	0.965358	0.961819
74.0114	1424.69	1188.14	1299.98	1304.27			74.0114	0.979857	0.938943	0.967594	0.962131
75.0114	1431.79	1190.27	1300.99	1307.68			75.0114	0.984737	0.94062	0.968346	0.964568
76.0114	1426.91	1194.69	1305.6	1309.07			76.0114	0.981384	0.944117	0.971774	0.965758
77.0114	1420.97	1193.3	1302.74	1305.67			77.0114	0.977299	0.943012	0.969649	0.96332
78.0115	1424.57	1187.39	1304.68	1305.55			78.0115	0.979773	0.938348	0.971095	0.963072
79.0114	1431.08	1190.87	1302.22	1308.06			79.0114	0.98425	0.941094	0.969258	0.964867
80.0114	1430.88	1192.03	1301.24	1308.05			80.0114	0.984113	0.942015	0.968534	0.964887
81.0114	1432.85	1190.59	1302.29	1308.58			81.0114	0.985466	0.940873	0.969312	0.965217
82.0114	1428.29	1186.22	1296.94	1303.82			82.0114	0.982333	0.937423	0.965334	0.961697
83.0114	1421.76	1195.53	1296.89	1304.73			83.0114	0.977842	0.944779	0.965291	0.962637
84.0114	1430.34	1193.84	1298.37	1307.52			84.0114	0.983743	0.943443	0.966396	0.964527
85.0114	1428.73	1195.48	1298.49	1307.57			85.0114	0.982632	0.944741	0.966487	0.96462
86.0114	1425.84	1196.55	1301.04	1307.81			86.0114	0.980646	0.945587	0.968383	0.964872
87.0114	1423.53	1190.74	1303.04	1305.77			87.0114	0.979056	0.940993	0.96987	0.963306
88.0115	1423.36	1194.81	1299.84	1306			88.0115	0.978941	0.94421	0.967488	0.963546
89.0115	1425.43	1183.71	1297	1302.04			89.0115	0.980364	0.935436	0.965373	0.960391
90.0124	1426.03	1188.13	1307.62	1307.26			90.0124	0.980779	0.938933	0.973275	0.964329
91.0115	1421.7	1193.22	1299.25	1304.72			91.0115	0.977795	0.942953	0.967051	0.9626
92.0115	1432.59	1188	1298.29	1306.29			92.0115	0.985289	0.93883	0.966335	0.963484
93.0115	1427.41	1196.58	1297.93	1307.31			93.0115	0.981728	0.945608	0.966067	0.964468
94.0114	1425.34	1194.31	1295.25	1304.96			94.0114	0.980301	0.943811	0.964074	0.962728
95.0115	1427.55	1194.41	1296.71	1306.22			95.0115	0.981822	0.943894	0.965157	0.963624
96.0114	1427.84	1195.95	1299.7	1307.83			96.0114	0.982023	0.945109	0.967388	0.96484
97.0114	1424.82	1191.24	1300.07	1305.37			97.0114	0.979941	0.94139	0.967656	0.962996
98.0115	1425.42	1191.75	1298.85	1305.34			98.0115	0.980359	0.941791	0.966752	0.962967
99.0114	1432.3	1191.31	1297.34	1306.98			99.0114	0.985089	0.941444	0.965626	0.964053
100.011	1426.02	1193.63	1302.27	1307.31			100.011	0.980768	0.943275	0.969299	0.964447
101.011	1424.76	1191.54	1293.16	1303.15			101.011	0.979905	0.941624	0.962518	0.961349
102.011	1414.44	1197.23	1294.32	1302			102.011	0.972804	0.94612	0.96338	0.960768
103.011	1418.96	1196.73	1294.83	1303.51			103.011	0.975916	0.945725	0.963759	0.9618
104.011	1421.2	1198.54	1300.08	1306.6			104.011	0.977453	0.947155	0.967667	0.964092
105.011	1419.62	1187.39	1298.3	1301.77			105.011	0.976365	0.93835	0.966342	0.960352
106.011	1417.58	1191.77	1298.01	1302.45			106.011	0.974965	0.941803	0.966124	0.960964
107.249	1418.23	1188.46	1293.34	1300.01			107.249	0.975411	0.93919	0.96265	0.959083
108.085	1412.32	1191.41	1298.25	1300.66			108.085	0.971348	0.941523	0.966305	0.959725
109.113	1412.24	1193.49	1292.47	1299.4			109.113	0.971289	0.943169	0.962003	0.95882
110.136	1409.72	1193.82	1297.38	1300.3			110.136	0.969558	0.943425	0.965656	0.959546
111.162	1411.57	1191.88	1295.14	1299.53			111.162	0.97083	0.941894	0.963992	0.958905
112.088	1409.09	1184.62	1292.53	1295.41			112.088	0.969124	0.936153	0.962049	0.955776
113.116	1411.47	1184.32	1292.42	1296.07			113.116	0.970765	0.93592	0.961964	0.956216
114.139	1414.44	1184.91	1296.27	1298.54			114.139	0.972806	0.93639	0.964831	0.958009
115.164	1411.82	1188.48	1291.67	1297.32			115.164	0.971005	0.939209	0.961405	0.957207
116.09	1419.7	1184.77	1296.28	1300.25			116.09	0.976425	0.936275	0.964842	0.959181
117.118	1420.52	1187.14	1298.37	1302.01			117.118	0.976987	0.938152	0.966396	0.960512
118.136	1414.85	1185.36	1293.15	1297.79			118.136	0.973088	0.93674	0.962513	0.957447
119.161	1415.43	1193.04	1288.12	1298.86			119.161	0.973483	0.942807	0.958767	0.958352
120.087	1409.87	1189.43	1291.6	1296.97			120.087	0.969663	0.93996	0.961355	0.956993
121.116	1408.49	1191.98	1289.27	1296.58			121.116	0.968713	0.941975	0.959619	0.956769
122.14	1408.44	1195.1	1292.71	1298.75			122.14	0.968679	0.944435	0.96218	0.958431
123.166	1411.41	1178.13	1296.99	1295.51			123.166	0.970722	0.931028	0.965371	0.955707
124.091	1409.88	1188.53	1292.52	1296.98			124.091	0.969671	0.939247	0.96204	0.956986
125.12	1406	1186.97	1289.53	1294.17			125.12	0.967001	0.938014	0.959813	0.954943
126.143	1408.52	1183.83	1291.61	1294.65			126.143	0.968732	0.935535	0.961361	0.955209
127.169	1408.54	1190.37	1297.38	1298.76			127.169	0.968746	0.940697	0.965661	0.958368
128.096	1411.27	1186.81	1296	1298.03			128.096	0.970624	0.937888	0.964632	0.957714
129.125	1411.97	1190.01	1290.82	1297.6			129.125	0.971107	0.94042	0.960773	0.957433
130.15	1410.47	1187.73	1294.33	1297.51			130.15	0.970074	0.938615	0.963385	0.957358
131.086	1406.03	1191.28	1292.85	1296.72			131.086	0.967022	0.941424	0.962287	0.956911
132.114	1402.19	1182.93	1288.75	1291.29			132.114	0.964382	0.934819	0.959232	0.952811
133.142	1405.66	1189.13	1295.39	1296.73			133.142	0.966767	0.939725	0.964176	0.956889
134.165	1400.89	1185.9	1293.66	1293.49			134.165	0.96349	0.937172	0.962887	0.954516
135.088	1406.59	1184.99	1297.03	1296.2			135.088	0.967408	0.936447	0.965397	0.956418
136.115	1410.13	1193.16	1294.02	1299.1			136.115	0.96984	0.942908	0.963155	0.958634
137.144	1404.84	1190.38	1292.91	1296.05			137.144	0.966205	0.940707	0.962334	0.956415
138.168	1397.45	1188.93	1287.88	1291.42			138.168	0.961117	0.939563	0.95859	0.95309
139.087	1403.32	1188.84	1287.01	1293.06			139.087	0.965158	0.939492	0.957937	0.954196
140.114	1407.35	1189.77	1288.21	1295.11			140.114	0.967931	0.940229	0.958836	0.955665
141.143	1406.53	1191.48	1289.97	1295.99			141.143	0.967365	0.941578	0.960144	0.956362
142.162	1404.23	1187.46	1293.59	1295.09			142.162	0.965782	0.938399	0.962836	0.955673
143.085	1408.93	1185.36	1296.84	1297.04			143.085	0.969016	0.93674	0.965252	0.957003
144.111	1408.65	1190.64	1294.42	1297.9			144.111	0.968827	0.940914	0.963454	0.957732
145.14	1405.92	1182.61	1289.73	1292.75			145.14	0.966948	0.934565	0.959965	0.953826
146.159	1407.42	1185.92	1292.7	1295.35			146.159	0.967979	0.937182	0.962176	0.955779
147.085	1408.42	1190.46	1292.44	1297.11			147.085	0.968665	0.940774	0.961982	0.957141
148.111	1397.97	1189.47	1291.09	1292.85			148.111	0.961476	0.939994	0.960978	0.954149
149.139	1398.69	1185.29	1285.98	1289.99			149.139	0.961977	0.936682	0.95717	0.951943
150.163	1397.88	1188.08	1288.25	1291.4			150.163	0.961413	0.938889	0.95886	0.953054
151.087	1402.93	1182.51	1292.39	1292.61			151.087	0.964889	0.934489	0.961943	0.953774
152.113	1404.56	1184.97	1296.49	1295.34			152.113	0.966011	0.936434	0.964993	0.955812
153.142	1393.4	1187.69	1292.29	1291.13			153.142	0.958338	0.938585	0.961867	0.95293
154.166	1399.53	1184.49	1292.96	1292.33			154.166	0.962551	0.936054	0.962366	0.953657
155.09	1403.73	1187.37	1294.22	1295.11			155.09	0.965438	0.93833	0.963309	0.955692
156.117	1398.13	1185.69	1292.41	1292.08			156.117	0.96159	0.937003	0.961958	0.953517
157.145	1398.24	1190.08	1295.83	1294.72			157.145	0.961662	0.940474	0.964504	0.955547
158.169	1400.66	1188.64	1290.64	1293.31			158.169	0.963328	0.939332	0.960643	0.954434
159.094	1399.17	1187.47	1285.62	1290.75			159.094	0.962303	0.938405	0.956904	0.952538
160.12	1396.53	1189.52	1283.32	1289.79			160.12	0.960486	0.940031	0.955194	0.951904
161.144	1400.51	1183.91	1287.47	1290.63			161.144	0.963229	0.935598	0.958279	0.952369
162.167	1398.57	1185.25	1292.63	1292.15			162.167	0.961893	0.936655	0.962124	0.953557
163.093	1390.04	1186.47	1292.4	1289.64			163.093	0.956026	0.937619	0.961953	0.951866
164.12	1398.74	1187.98	1289.98	1292.23			164.12	0.962006	0.93881	0.960153	0.953656
165.149	1396.85	1191.01	1288.8	1292.22			165.149	0.960704	0.941207	0.959267	0.953726
166.173	1387.16	1189.85	1282.1	1286.37			166.173	0.954042	0.940288	0.954284	0.949538
167.098	1395.64	1190.29	1285.25	1290.39			167.098	0.959874	0.94064	0.956627	0.95238
168.113	1389.22	1187.2	1288.43	1288.28			168.113	0.95546	0.938198	0.958992	0.950883

## Sheet: 10 uM ATP (+luciferase)
RAW DATA							NORMALIZED
time (s)	trial 1	trial 2	trial 3	mean			time (s)	trial 1	trial 2	trial 3	mean
0	1507.41	1471.77	1190.8	1489.59			0	1	0.990204	0.995735	0.995102
1.03664	1498.11	1481.37	1190.93	1489.74			1.03664	0.993826	0.996663	0.995842	0.995244
2.06326	1495.07	1485.13	1180.22	1490.1			2.06326	0.991809	0.999193	0.986886	0.995501
3.09146	1494.76	1486.33	1182.77	1490.54			3.09146	0.991606	1	0.989019	0.995803
4.11559	1488.67	1483.07	1183.05	1485.87			4.11559	0.987566	0.997807	0.989253	0.992687
5.0405	1485.62	1483.7	1177.77	1484.66			5.0405	0.985543	0.998232	0.98484	0.991888
6.06661	1489.34	1479.92	1180.48	1484.63			6.06661	0.988009	0.995691	0.987102	0.99185
7.09461	1487.3	1481.15	1170.68	1484.22			7.09461	0.986658	0.996517	0.978911	0.991587
8.11765	1485.61	1477.74	1172.14	1481.68			8.11765	0.985538	0.994224	0.980132	0.989881
9.04064	1479.4	1481.83	1170.18	1480.61			9.04064	0.981415	0.996974	0.978489	0.989195
10.0666	1481.02	1484.86	696.915	1482.94			10.0666	0.982495	0.999009	0.582753	0.990752
11.0951	1479.39	1479.38	368.282	1479.39			11.0951	0.981414	0.995329	0.307953	0.988371
12.1199	1478.5	1481.57	371.936	1480.03			12.1199	0.980818	0.996796	0.311009	0.988807
13.0427	1480.23	1477.43	369.824	1478.83			13.0427	0.981966	0.994014	0.309243	0.98799
14.0676	1476.55	1476.07	367.912	1476.31			14.0676	0.979523	0.9931	0.307644	0.986312
15.0904	1486.19	1476.79	367.771	1481.49			15.0904	0.985921	0.993585	0.307526	0.989753
16.1148	1496.98	1481.89	367.034	1489.43			16.1148	0.993079	0.997013	0.306909	0.995046
17.0383	1500.35	1474.24	356.982	1487.29			17.0383	0.995313	0.991866	0.298504	0.99359
18.0595	1494.36	1447.43	356.156	1470.9			18.0595	0.991343	0.973833	0.297813	0.982588
19.0885	1469.53	1431.24	357.034	1450.39			19.0885	0.974869	0.962937	0.298548	0.968903
20.1101	1458.15	1423.14	356.127	1440.65			20.1101	0.967323	0.957486	0.297789	0.962404
21.0366	1449.19	1414.99	357.321	1432.09			21.0366	0.961379	0.952006	0.298788	0.956693
22.061	1446.08	1417.85	357.026	1431.96			22.061	0.959313	0.953927	0.298541	0.95662
23.0894	1435.57	1412.47	357.052	1424.02			23.0894	0.952341	0.950307	0.298563	0.951324
24.1126	1431.6	1403.14	357.409	1417.37			24.1126	0.949705	0.944035	0.298861	0.94687
25.0366	1428.47	1396.46	1195.9	1412.46			25.0366	0.947627	0.939539	1	0.943583
26.0621	1419.04	1403.9	1171.5	1411.47			26.0621	0.941373	0.944545	0.979597	0.942959
27.0919	1420.27	1406.3	1162.88	1413.29			27.0919	0.942192	0.946158	0.972383	0.944175
28.1158	1419.01	1400.39	1161.51	1409.7			28.1158	0.941358	0.942181	0.971239	0.94177
29.0395	1420.68	1400.65	1155.81	1410.66			29.0395	0.942463	0.942356	0.966475	0.942409
30.0366	1411.13	1407.83	1152.99	1409.48			30.0366	0.936131	0.947187	0.964115	0.941659
31.0366	1418.62	1404.44	1153.86	1411.53			31.0366	0.941094	0.944906	0.964847	0.943
32.0366	1417.51	1402.36	1150.95	1409.93			32.0366	0.94036	0.943505	0.962415	0.941932
33.0367	1412.96	1408.79	1151.95	1410.87			33.0367	0.937343	0.947829	0.963247	0.942586
34.0316	1415.44	1418.18	1147.84	1416.81			34.0316	0.938988	0.954149	0.959813	0.946568
35.0366	1412.91	1417.35	1146.81	1415.13			35.0366	0.937311	0.953594	0.958949	0.945453
36.0366	1415.67	1413.3	1146.17	1414.49			36.0366	0.939137	0.950871	0.958416	0.945004
37.0366	1416.84	1412.97	1143.52	1414.91			37.0366	0.939915	0.950647	0.956198	0.945281
38.0366	1413.51	1410.09	1143.97	1411.8			38.0366	0.937703	0.948706	0.95657	0.943204
39.0366	1416.53	1414.74	1143.4	1415.63			39.0366	0.939711	0.951834	0.956102	0.945773
40.0366	1424.64	1415.64	1144.66	1420.14			40.0366	0.94509	0.952443	0.957154	0.948766
41.0366	1415.47	1413.63	1143.53	1414.55			41.0366	0.93901	0.951089	0.956207	0.945049
42.0366	1410.91	1418.1	1144.21	1414.5			42.0366	0.93598	0.954098	0.956775	0.945039
43.0366	1416.15	1422.24	1133.24	1419.2			43.0366	0.939459	0.956882	0.947602	0.948171
44.0366	1416.99	1425.62	1133.14	1421.3			44.0366	0.940013	0.959154	0.947519	0.949584
45.0366	1416.98	1420.42	1134.05	1418.7			45.0366	0.94001	0.955656	0.94828	0.947833
46.0366	1414.17	1422.07	1134.01	1418.12			46.0366	0.938144	0.956768	0.948248	0.947456
47.0366	1416.02	1425.03	1132.79	1420.52			47.0366	0.93937	0.958757	0.94723	0.949064
48.0366	1419.36	1427.47	1131.63	1423.42			48.0366	0.941587	0.960402	0.946256	0.950995
49.0366	1420.03	1424.64	1139.03	1422.34			49.0366	0.94203	0.958498	0.952442	0.950264
50.0366	1426.94	1422.58	1133.32	1424.76			50.0366	0.946614	0.957107	0.947671	0.951861
51.0366	1424.55	1422.68	1133.33	1423.62			51.0366	0.945027	0.957181	0.947673	0.951104
52.0366	1427.55	1432.35	1131.4	1429.95			52.0366	0.947018	0.963684	0.946062	0.955351
53.0366	1423.92	1432.8	1131.95	1428.36			53.0366	0.944609	0.963985	0.946519	0.954297
54.0366	1426.54	1429.84	1129.83	1428.19			54.0366	0.94635	0.961994	0.944753	0.954172
55.0366	1418.97	1433	1129.55	1425.99			55.0366	0.941332	0.964125	0.944515	0.952728
56.0366	1418.35	1431.61	1127.99	1424.98			56.0366	0.940919	0.963183	0.94321	0.952051
57.0366	1424.21	1429.77	1129.02	1426.99			57.0366	0.944803	0.961952	0.944072	0.953377
58.1126	1416.2	1432.5	1128.46	1424.35			58.1126	0.939489	0.963783	0.943603	0.951636
59.1359	1418.05	1426.24	1125.7	1422.14			59.1359	0.940718	0.95957	0.941297	0.950144
60.1633	1422.62	1433.24	1131.27	1427.93			60.1633	0.943748	0.964281	0.945957	0.954015
61.1924	1423.52	1430.29	1127.3	1426.9			61.1924	0.944345	0.962298	0.942635	0.953322
62.1181	1420.49	1433.68	1129.03	1427.09			62.1181	0.94234	0.964579	0.944078	0.953459
63.1421	1426.65	1437.32	1128.44	1431.99			63.1421	0.946426	0.967031	0.943589	0.956729
64.1625	1420.78	1431.05	1125.54	1425.91			64.1625	0.942529	0.962806	0.941164	0.952667
65.1904	1421.87	1436.88	1127.12	1429.37			65.1904	0.943254	0.966728	0.942489	0.954991
66.1167	1418.88	1432.4	1129.97	1425.64			66.1167	0.941272	0.963716	0.944864	0.952494
67.1397	1420.62	1439.52	1130.14	1430.07			67.1397	0.942425	0.968505	0.945012	0.955465
68.1657	1417.87	1437.03	1127.88	1427.45			68.1657	0.940599	0.966836	0.943125	0.953717
69.194	1413.78	1432.69	1127.27	1423.24			69.194	0.937882	0.963916	0.94261	0.950899
70.1219	1412.69	1447.51	1128.4	1430.1			70.1219	0.937164	0.973884	0.943557	0.955524
71.1448	1420.99	1439.72	1126.75	1430.35			71.1448	0.942665	0.968643	0.942175	0.955654
72.1717	1413.91	1436.7	1126.61	1425.3			72.1717	0.937973	0.966609	0.942056	0.952291
73.2001	1407.92	1440.07	1126.26	1424			73.2001	0.934001	0.96888	0.941764	0.95144
74.1252	1417.09	1442.49	1128.9	1429.79			74.1252	0.940083	0.970506	0.943973	0.955294
75.1502	1417.11	1441.4	1130.66	1429.26			75.1502	0.940098	0.969773	0.945449	0.954935
76.1763	1418.6	1446.33	1130.97	1432.47			76.1763	0.941083	0.973091	0.945708	0.957087
77.1126	1411.02	1443.54	1131.93	1427.28			77.1126	0.936053	0.971214	0.946511	0.953633
78.14	1417.29	1450.12	1128.87	1433.7			78.14	0.940215	0.975638	0.943946	0.957927
79.1127	1418.84	1448.99	1127.45	1433.92			79.1127	0.94124	0.974883	0.942759	0.958062
80.1126	1421.09	1445.45	1130.4	1433.27			80.1126	0.942735	0.972498	0.945225	0.957616
81.1116	1416.71	1439.08	1131.59	1427.89			81.1116	0.939831	0.96821	0.946221	0.95402
82.1116	1422.87	1440.51	1125.85	1431.69			82.1116	0.943914	0.969176	0.941423	0.956545
83.1116	1427.68	1440.74	1125.66	1434.21			83.1116	0.947105	0.96933	0.941262	0.958218
84.1116	1426.53	1441.38	1127.2	1433.96			84.1116	0.946342	0.969763	0.942552	0.958052
85.1116	1428.18	1443.63	1128.95	1435.9			85.1116	0.947435	0.971275	0.944011	0.959355
86.1126	1423.92	1439.35	1129.59	1431.63			86.1126	0.94461	0.968394	0.944552	0.956502
87.1116	1422.28	1435.14	1126.4	1428.71			87.1116	0.943526	0.965564	0.941887	0.954545
88.1116	1421.09	1438.87	1129.88	1429.98			88.1116	0.942733	0.968072	0.944789	0.955403
89.1116	1413.41	1439.76	1128.91	1426.59			89.1116	0.937638	0.968673	0.943982	0.953155
90.1116	1422.31	1444.25	1128.4	1433.28			90.1116	0.943544	0.971692	0.943553	0.957618
91.1116	1428.44	1443.43	1131	1435.93			91.1116	0.947611	0.971139	0.945729	0.959375
92.1116	1428.42	1439.27	1128.5	1433.84			92.1116	0.947596	0.96834	0.943641	0.957968
93.1116	1428.63	1443.14	1127.84	1435.88			93.1116	0.947735	0.970943	0.943085	0.959339
94.1126	1424.93	1439.34	1125.71	1432.14			94.1126	0.945284	0.968389	0.941308	0.956836
95.1126	1431.2	1444.05	1126.35	1437.63			95.1126	0.949445	0.971554	0.941843	0.960499
96.1116	1429.53	1443.43	1132.4	1436.48			96.1116	0.948335	0.971142	0.946898	0.959739
97.1116	1428.92	1451.82	1129.75	1440.37			97.1116	0.947931	0.976783	0.944682	0.962357
98.1116	1430.9	1453.11	1132.79	1442			98.1116	0.949242	0.977648	0.947224	0.963445
99.1126	1428.86	1449.12	1130.95	1438.99			99.1126	0.947891	0.974965	0.94569	0.961428
100.112	1429.55	1451.36	1126.92	1440.46			100.112	0.948349	0.976476	0.942318	0.962412
101.112	1426.31	1448.51	1135.53	1437.41			101.112	0.946199	0.974556	0.949517	0.960378
102.112	1428.4	1445.02	1130.18	1436.71			102.112	0.947587	0.97221	0.945042	0.959899
103.324	1426.9	1444.18	1128.45	1435.54			103.324	0.946587	0.971647	0.943599	0.959117
104.342	1428.12	1449.21	1123.92	1438.66			104.342	0.9474	0.975026	0.939809	0.961213
105.368	1423.6	1452.62	1130.01	1438.11			105.368	0.944398	0.97732	0.944899	0.960859
106.397	1425.89	1455.02	1130.69	1440.46			106.397	0.945922	0.978935	0.945468	0.962428
107.324	1421.41	1451.67	1129.04	1436.54			107.324	0.942945	0.976684	0.94409	0.959815
108.348	1421.05	1452.68	1130.38	1436.86			108.348	0.942708	0.97736	0.945209	0.960034
109.373	1424.26	1448.43	1122.58	1436.35			109.373	0.944838	0.974506	0.938689	0.959672
110.402	1425.68	1449.65	1126.05	1437.66			110.402	0.94578	0.975322	0.941592	0.960551
111.329	1421.9	1442.17	1128.8	1432.03			111.329	0.943274	0.970289	0.94389	0.956781
112.353	1423.05	1443.17	1126.11	1433.11			112.353	0.944033	0.970967	0.941638	0.9575
113.377	1421.72	1444.9	1127.32	1433.31			113.377	0.943149	0.972128	0.942652	0.957638
114.405	1415.11	1449.67	1132.7	1432.39			114.405	0.938768	0.975333	0.947153	0.957051
115.331	1417.06	1450.19	1128.98	1433.63			115.331	0.940063	0.97569	0.94404	0.957876
116.349	1414.32	1458.89	1130.49	1436.61			116.349	0.938244	0.98154	0.945305	0.959892
117.375	1419.36	1448.38	1129.84	1433.87			117.375	0.941589	0.974467	0.944755	0.958028
118.404	1422.92	1454.89	1129.83	1438.91			118.404	0.94395	0.978852	0.944749	0.961401
119.331	1421.76	1447.35	1127.91	1434.56			119.331	0.943181	0.973776	0.94315	0.958478
120.355	1418.8	1450.67	1129.37	1434.74			120.355	0.941215	0.97601	0.944368	0.958613
121.381	1416.23	1449.64	1129.27	1432.93			121.381	0.939509	0.975315	0.944278	0.957412
122.409	1417.74	1447.32	1126.61	1432.53			122.409	0.940514	0.973757	0.942054	0.957136
123.336	1412.86	1451.57	1124.63	1432.22			123.336	0.937275	0.976617	0.940403	0.956946
124.355	1408.3	1456.51	1125.38	1432.4			124.355	0.934248	0.97994	0.941034	0.957094
125.381	1413.53	1450.02	1121.66	1431.78			125.381	0.937718	0.975574	0.937923	0.956646
126.41	1416.44	1448.66	1125.93	1432.55			126.41	0.93965	0.974656	0.941488	0.957153
127.335	1417.82	1451.37	1122.73	1434.59			127.335	0.940564	0.976481	0.938814	0.958522
128.359	1416.54	1445.63	1127.05	1431.09			128.359	0.939715	0.972622	0.942431	0.956168
129.382	1416.52	1443.34	1127.47	1429.93			129.382	0.939701	0.971076	0.942775	0.955389
130.41	1423.8	1446.92	1128.9	1435.36			130.41	0.944532	0.973487	0.943975	0.95901
131.336	1423.86	1444.2	1129.83	1434.03			131.336	0.944572	0.97166	0.944753	0.958116
132.359	1422.12	1436.82	1126.3	1429.47			132.359	0.943421	0.96669	0.941799	0.955055
133.38	1414.32	1440.98	1125.8	1427.65			133.38	0.938244	0.969492	0.941383	0.953868
134.403	1418.56	1441.18	1129.26	1429.87			134.403	0.941055	0.969626	0.944274	0.955341
135.328	1423.9	1441.9	1129.36	1432.9			135.328	0.944599	0.970113	0.94436	0.957356
136.35	1425.12	1446.33	1129.26	1435.72			136.35	0.945405	0.973091	0.944274	0.959248
137.376	1420.96	1440.22	1131.09	1430.59			137.376	0.942647	0.968976	0.945805	0.955811
138.405	1412.47	1442.78	1130.84	1427.62			138.405	0.937016	0.970701	0.945595	0.953859
139.326	1420.13	1443.21	1125.85	1431.67			139.326	0.942101	0.970991	0.941421	0.956546
140.349	1421.49	1445.15	1127.23	1433.32			140.349	0.942998	0.972292	0.942577	0.957645
141.374	1416.02	1448.6	1125.16	1432.31			141.374	0.939373	0.974614	0.940846	0.956993
142.398	1422.27	1449.48	1124.14	1435.88			142.398	0.943521	0.975207	0.939997	0.959364
143.324	1419.76	1451.91	1123.99	1435.84			143.324	0.941852	0.976846	0.939868	0.959349
144.342	1418.7	1451.25	1123.49	1434.97			144.342	0.941151	0.976397	0.939452	0.958774
145.362	1424.2	1452.92	1125.4	1438.56			145.362	0.944794	0.977523	0.941045	0.961159
146.392	1420.02	1454.64	1127.13	1437.33			146.392	0.942023	0.978681	0.942493	0.960352
147.408	1417.49	1450.37	1124.01	1433.93			147.408	0.94035	0.975808	0.93988	0.958079
148.33	1417.1	1454.19	1127.7	1435.65			148.33	0.940088	0.97838	0.94297	0.959234
149.357	1413.78	1448.71	1126.44	1431.25			149.357	0.937884	0.974693	0.94192	0.956288
150.381	1414.35	1453.65	1125.75	1434			150.381	0.93826	0.978015	0.941339	0.958137
151.405	1418.8	1450.68	1122.44	1434.74			151.405	0.941214	0.976018	0.938574	0.958616
152.33	1413.2	1449.38	1122.59	1431.29			152.33	0.937501	0.975145	0.938697	0.956323
153.355	1415.88	1449.76	1119.89	1432.82			153.355	0.939275	0.975401	0.936437	0.957338
154.379	1413.19	1451.34	1116.68	1432.26			154.379	0.937492	0.97646	0.933751	0.956976
155.404	1421.19	1439.25	1115.85	1430.22			155.404	0.942799	0.968328	0.933059	0.955564
156.328	1421.33	1442.53	1116.89	1431.93			156.328	0.942896	0.970535	0.933931	0.956715
157.353	1417.21	1440.87	1117	1429.04			157.353	0.940162	0.969413	0.934021	0.954788
158.382	1413.66	1443.64	1114.9	1428.65			158.382	0.937806	0.971278	0.932265	0.954542
159.405	1412.75	1441.88	1119.01	1427.31			159.405	0.937199	0.970092	0.935699	0.953646
160.327	1414.83	1441.68	1120.94	1428.25			160.327	0.93858	0.96996	0.937317	0.95427
161.354	1410.6	1437.36	1117.97	1423.98			161.354	0.935776	0.967055	0.934832	0.951415
162.382	1415.72	1436.59	1122.9	1426.15			162.382	0.939172	0.966535	0.938956	0.952854
163.405	1413.32	1438.53	1121.26	1425.92			163.405	0.937577	0.967845	0.937583	0.952711
164.325	1416.68	1450.95	1120.63	1433.82			164.325	0.939811	0.976196	0.937062	0.958004
165.352	1421.77	1442.82	1118.09	1432.29			165.352	0.943184	0.970728	0.934932	0.956956
166.381	1414.43	1437.94	1114.83	1426.18			166.381	0.938315	0.967443	0.932208	0.952879
167.404	1410.39	1441.61	1114.82	1426			167.404	0.935636	0.969912	0.932202	0.952774
168.327	1413.13	1444.68	1119.5	1428.91			168.327	0.937452	0.971983	0.936109	0.954718
169.347	1418.63	1440.57	1119.99	1429.6			169.347	0.941101	0.969213	0.936527	0.955157
170.376	1410.49	1444.49	1118.64	1427.49			170.376	0.935701	0.971853	0.935392	0.953777
171.4	1408.86	1443.27	1116.33	1426.07			171.4	0.93462	0.971034	0.933462	0.952827

## Sheet: 100 uM ATP (+luciferase)
RAW DATA							NORMALIZED
time (s)	trial 1	trial 2	trial 3	mean			time (s)	trial 1	trial 2	trial 3	mean
0	1307.98	1548.76	1566.25	1557.51			0	0.996761	0.994065	0.99787	0.995968
1.04062	1312.23	1549.84	1569.6	1559.72			1.04062	1	0.994755	1	0.997377
2.06908	1305.76	1555.33	1561.19	1558.26			2.06908	0.995071	0.998277	0.994642	0.996459
3.09285	1305.22	1556.44	1560.89	1558.66			3.09285	0.994662	0.998992	0.994454	0.996723
4.01558	1305.11	1550.9	1556.57	1553.73			4.01558	0.994574	0.99544	0.991698	0.993569
5.04045	1302.52	1546.9	1559.23	1553.06			5.04045	0.992602	0.992869	0.993395	0.993132
6.06921	1300.38	1550.22	1566.14	1558.18			6.06921	0.990966	0.995003	0.9978	0.996402
7.09328	1296.43	1554.3	1566.21	1560.26			7.09328	0.987959	0.99762	0.997843	0.997732
8.01788	1305.91	1548.75	1564.44	1556.6			8.01788	0.99518	0.994058	0.996716	0.995387
9.04334	1309.49	1548.35	1560.96	1554.65			9.04334	0.997916	0.993797	0.994497	0.994147
10.0722	1302.77	1552.69	1568.55	1560.62			10.0722	0.992795	0.996585	0.999331	0.997958
11.0959	1293.98	1547.56	1564.89	1556.22			11.0959	0.986089	0.99329	0.997001	0.995145
12.0201	1297.18	1546.14	1564.23	1555.19			12.0201	0.988527	0.992383	0.996584	0.994483
13.0466	1294.11	1551.55	1557.93	1554.74			13.0466	0.986193	0.99585	0.992571	0.994211
14.0757	1296.17	1554.3	1559.55	1556.93			14.0757	0.987765	0.99762	0.993602	0.995611
15.0986	1296.95	1558.01	1562.09	1560.05			15.0986	0.988354	1	0.995219	0.997609
16.0213	1295.7	1552.07	1564.44	1558.25			16.0213	0.987403	0.996189	0.996713	0.996451
17.0478	1300.66	1475.99	1565.17	1520.58			17.0478	0.991187	0.947358	0.997181	0.972269
18.0756	1301.55	1422.55	1512.66	1467.61			18.0756	0.991857	0.913057	0.963726	0.938392
19.0991	1296.23	1396.49	1457.74	1427.12			19.0991	0.987811	0.896333	0.92874	0.912536
20.0214	1285.06	1382.71	1437.44	1410.07			20.0214	0.979293	0.887481	0.915802	0.901641
21.0471	1282.54	1380.51	1422.21	1401.36			21.0471	0.977374	0.886071	0.906103	0.896087
22.0759	1270.47	1368.8	1409.77	1389.28			22.0759	0.968176	0.878553	0.898176	0.888365
23.0986	1270.59	1365.92	1404.89	1385.41			23.0986	0.968266	0.876711	0.895067	0.885889
24.0219	1269.03	1365.73	1399.71	1382.72			24.0219	0.967079	0.876586	0.891763	0.884175
25.0485	1266.74	1361.27	1394.89	1378.08			25.0485	0.965338	0.873722	0.888697	0.88121
26.0768	1266.67	1357.4	1395.92	1376.66			26.0768	0.965279	0.87124	0.889349	0.880294
27.0954	1262.24	1348.96	1400.88	1374.92			27.0954	0.961906	0.865822	0.892509	0.879166
28.0184	1259.78	1353.95	1392.11	1373.03			28.0184	0.960028	0.869024	0.886921	0.877973
29.039	1263.85	1353.6	1391	1372.3			29.039	0.96313	0.868797	0.886213	0.877505
30.0678	1261.24	1353.54	1390.52	1372.03			30.0678	0.961144	0.868764	0.885908	0.877336
31.0869	1259.64	1356.38	1383.64	1370.01			31.0869	0.959919	0.870582	0.881527	0.876054
32.0116	1256.99	1355.27	1383.09	1369.18			32.0116	0.9579	0.869872	0.881175	0.875524
33.0374	1251.07	1354.53	1386.13	1370.33			33.0374	0.95339	0.869394	0.88311	0.876252
34.0652	1252.64	1356.93	1382.89	1369.91			34.0652	0.954593	0.87094	0.881047	0.875993
35.0884	1252.99	1354.54	1377.9	1366.22			35.0884	0.954852	0.869404	0.877868	0.873636
36.042	1257.5	1351.76	1377.65	1364.71			36.042	0.958296	0.867621	0.877712	0.872667
37.0116	1246.17	1350.39	1369.52	1359.96			37.0116	0.949662	0.866743	0.872529	0.869636
38.0116	1246.38	1344.68	1369.36	1357.02			38.0116	0.949816	0.863077	0.872429	0.867753
39.0116	1246.34	1343.75	1364.43	1354.09			39.0116	0.94979	0.862478	0.86929	0.865884
40.0116	1246.07	1344.94	1362.61	1353.77			40.0116	0.949582	0.863242	0.868127	0.865685
41.0116	1245.02	1341.72	1354.86	1348.29			41.0116	0.948784	0.861179	0.863189	0.862184
42.0116	1234.98	1344.27	1358.64	1351.45			42.0116	0.941133	0.862814	0.865597	0.864206
43.0116	1233.63	1343.14	1349.72	1346.43			43.0116	0.9401	0.862088	0.859915	0.861001
44.0116	1231.07	1347.99	1348.32	1348.16			44.0116	0.938153	0.865203	0.859023	0.862113
45.0116	1231.23	1345.16	1339.41	1342.29			45.0116	0.938273	0.863387	0.853351	0.858369
46.0116	1226.52	1341.3	1341.54	1341.42			46.0116	0.934682	0.860903	0.854706	0.857804
47.0116	1229.14	1340.78	1342.7	1341.74			47.0116	0.936678	0.860575	0.855444	0.858009
48.0116	1222.43	1339.72	1342.89	1341.31			48.0116	0.931571	0.859893	0.855565	0.857729
49.0116	1225.91	1334.59	1340.92	1337.76			49.0116	0.934217	0.856596	0.854313	0.855454
50.0116	1222.95	1337.03	1339.69	1338.36			50.0116	0.931967	0.858162	0.853526	0.855844
51.0116	1220.38	1333.44	1339.4	1336.42			51.0116	0.930005	0.855864	0.853341	0.854603
52.0116	1220.53	1329.7	1341.92	1335.81			52.0116	0.930121	0.853462	0.854948	0.854205
53.0116	1215.35	1324.61	1327.05	1325.83			53.0116	0.926173	0.85019	0.845473	0.847832
54.0116	1217.26	1326.85	1327.11	1326.98			54.0116	0.927629	0.85163	0.845511	0.84857
55.0115	1210.26	1323.91	1333.39	1328.65			55.0115	0.922294	0.849744	0.849515	0.84963
56.0116	1206.9	1324.88	1326.23	1325.55			56.0116	0.919732	0.850368	0.844949	0.847659
57.0116	1208.1	1316.26	1323.35	1319.8			57.0116	0.920648	0.844837	0.843112	0.843975
58.0116	1204.39	1311.01	1325.98	1318.49			58.0116	0.917819	0.841464	0.844791	0.843128
59.0115	1199.34	1312.12	1327.13	1319.63			59.0115	0.913969	0.84218	0.845522	0.843851
60.0116	1194.91	1311.77	1324.49	1318.13			60.0116	0.910597	0.841951	0.843839	0.842895
61.0116	1194.19	1309.23	1319.47	1314.35			61.0116	0.910046	0.840324	0.840642	0.840483
62.0105	1194.02	1310.03	1321.23	1315.63			62.0105	0.909917	0.840832	0.841763	0.841298
63.0116	1192.41	1314.94	1321.74	1318.34			63.0116	0.908694	0.843985	0.842088	0.843037
64.0116	1193.56	1304.32	1318.68	1311.5			64.0116	0.909568	0.837167	0.84014	0.838654
65.0116	1195.25	1302.6	1315.49	1309.04			65.0116	0.91085	0.836065	0.838108	0.837086
66.0116	1189.91	1301.35	1310.65	1306			66.0116	0.906785	0.835263	0.835023	0.835143
67.0065	1192.22	1304.42	1305.7	1305.06			67.0065	0.908543	0.837236	0.831867	0.834552
68.0116	1186.97	1309.94	1296.07	1303.01			68.0116	0.904548	0.840779	0.825735	0.833257
69.0116	1183.23	1312.06	1301.46	1306.76			69.0116	0.901692	0.84214	0.829171	0.835655
70.0116	1180.03	1313.06	1301.82	1307.44			70.0116	0.899253	0.842777	0.8294	0.836089
71.0065	1180.63	1314.02	1295.69	1304.86			71.0065	0.899712	0.843395	0.825495	0.834445
72.0116	1182.71	1310.75	1296.91	1303.83			72.0116	0.901301	0.841299	0.826274	0.833786
73.0118	1178.29	1309.09	1297.29	1303.18			73.0118	0.897927	0.840229	0.826509	0.833369
74.0115	1169.02	1310.87	1287.02	1298.94			74.0115	0.890868	0.841371	0.819968	0.83067
75.0116	1170.3	1312.8	1285.84	1299.32			75.0116	0.891843	0.84261	0.819218	0.830914
76.0116	1164.23	1302.61	1288.91	1295.76			76.0116	0.887218	0.836073	0.821174	0.828623
77.0116	1168.31	1308.66	1280.2	1294.43			77.0116	0.89032	0.839954	0.815624	0.827789
78.0115	1161.92	1304.76	1277.06	1290.91			78.0115	0.885451	0.837451	0.813624	0.825538
79.0116	1157.4	1298.67	1276.03	1287.35			79.0116	0.882011	0.833542	0.812964	0.823253
80.0115	1157.47	1299.58	1267.51	1283.55			80.0115	0.882062	0.83413	0.80754	0.820835
81.0065	1147.42	1302.75	1267.51	1285.13			81.0065	0.874403	0.836163	0.807543	0.821853
82.0116	1151.2	1298.15	1269.99	1284.07			82.0116	0.877285	0.83321	0.809116	0.821163
83.0115	1152.04	1303.65	1267.03	1285.34			83.0115	0.877926	0.83674	0.807237	0.821989
84.0115	1145.73	1300.27	1266.36	1283.31			84.0115	0.873119	0.834571	0.806804	0.820687
85.0116	1146.71	1297.39	1264.58	1280.98			85.0116	0.873864	0.832721	0.80567	0.819195
86.0116	1144.01	1294.71	1264.56	1279.63			86.0116	0.871804	0.831002	0.805658	0.81833
87.0116	1138.22	1293.61	1260.24	1276.92			87.0116	0.867391	0.830296	0.802906	0.816601
88.0116	1139.08	1287.31	1263.57	1275.44			88.0116	0.868046	0.82625	0.805031	0.81564
89.0116	1135.24	1293.82	1264.09	1278.95			89.0116	0.865119	0.830431	0.805357	0.817894
90.0116	1131.21	1287.86	1258.63	1273.24			90.0116	0.862053	0.826603	0.80188	0.814241
91.0116	1130.55	1281.57	1256.16	1268.86			91.0116	0.861551	0.822567	0.800308	0.811438
92.0116	1126.47	1283.22	1250.52	1266.87			92.0116	0.858439	0.823626	0.796713	0.81017
93.0116	1125.53	1285.9	1253.64	1269.77			93.0116	0.857722	0.825349	0.798706	0.812028
94.0116	1120.43	1282.96	1255.13	1269.05			94.0116	0.853834	0.823461	0.799655	0.811558
95.0116	1119.9	1277.87	1255.05	1266.46			95.0116	0.85343	0.82019	0.7996	0.809895
96.0116	1117.67	1276.75	1252.46	1264.6			96.0116	0.85173	0.819472	0.797949	0.808711
97.0116	1115.43	1273.1	1248.28	1260.69			97.0116	0.850027	0.817132	0.795291	0.806212
98.1206	1108.84	1278.91	1246.9	1262.91			98.1206	0.845003	0.82086	0.794412	0.807636
99.0548	1105.35	1274.63	1244.8	1259.71			99.0548	0.842342	0.818113	0.793069	0.805591
100.079	1105.6	1271.58	1247.2	1259.39			100.079	0.842533	0.816157	0.794603	0.80538
101.014	1102.45	1269.72	1239.19	1254.46			101.014	0.840132	0.814963	0.789498	0.80223
102.039	1095.6	1272.04	1240.82	1256.43			102.039	0.834917	0.816455	0.790534	0.803494
103.067	1105.59	1271.31	1236.45	1253.88			103.067	0.842526	0.815985	0.787754	0.801869
104.091	1097.25	1265.54	1241.44	1253.49			104.091	0.836174	0.812281	0.79093	0.801606
105.014	1094.78	1271.38	1243.37	1257.37			105.014	0.834293	0.816027	0.79216	0.804093
106.038	1092.21	1270.09	1241.13	1255.61			106.038	0.832333	0.815199	0.790733	0.802966
107.067	1084.74	1270.19	1239.59	1254.89			107.067	0.82664	0.815266	0.78975	0.802508
108.09	1082.7	1265.35	1237.47	1251.41			108.09	0.825082	0.812159	0.788399	0.800279
109.014	1083.5	1270.39	1234.45	1252.42			109.014	0.825692	0.815393	0.78648	0.800936
110.04	1081.28	1264.26	1231.15	1247.71			110.04	0.824	0.811461	0.784374	0.797918
111.069	1079.26	1260.9	1226.28	1243.59			111.069	0.822462	0.8093	0.781272	0.795286
112.093	1080.36	1265.99	1230.33	1248.16			112.093	0.823303	0.812569	0.78385	0.798209
113.016	1078.57	1263.37	1226.25	1244.81			113.016	0.82194	0.810885	0.781254	0.79607
114.042	1075.09	1257.3	1230.38	1243.84			114.042	0.819287	0.806994	0.783884	0.795439
115.07	1072.2	1262.66	1229.64	1246.15			115.07	0.81708	0.810433	0.783412	0.796923
116.092	1074.81	1258.36	1233.63	1245.99			116.092	0.81907	0.807668	0.785954	0.796811
117.014	1075.32	1256.19	1224.58	1240.38			117.014	0.819456	0.806279	0.780185	0.793232
118.041	1067.4	1252.64	1226.28	1239.46			118.041	0.813427	0.804003	0.781272	0.792637
119.069	1068.67	1262.84	1228.63	1245.74			119.069	0.814389	0.810544	0.782772	0.796658
120.092	1067.54	1261.82	1228.85	1245.33			120.092	0.813529	0.809889	0.782907	0.796398
121.012	1067.74	1262.14	1227.11	1244.62			121.012	0.813681	0.810097	0.781797	0.795947
122.038	1065.02	1256.2	1225.45	1240.82			122.038	0.811609	0.806285	0.780743	0.793514
123.065	1061.09	1252.79	1227.74	1240.26			123.065	0.808616	0.804095	0.782203	0.793149
124.088	1063.69	1247.34	1219.33	1233.33			124.088	0.810594	0.800595	0.776842	0.788719
125.013	1057.77	1249.07	1223.23	1236.15			125.013	0.806089	0.801705	0.779328	0.790517
126.038	1060.06	1250.37	1217.95	1234.16			126.038	0.807833	0.80254	0.775968	0.789254
127.066	1060.78	1252.47	1217.03	1234.75			127.066	0.808377	0.803891	0.775375	0.789633
128.089	1057.69	1246.15	1220.72	1233.44			128.089	0.806026	0.799836	0.777731	0.788783
129.012	1055.79	1247.89	1216.9	1232.4			129.012	0.804574	0.800954	0.775294	0.788124
130.036	1054.6	1248.62	1216.01	1232.31			130.036	0.803669	0.801417	0.77473	0.788073
131.065	1055.65	1247.16	1218.79	1232.97			131.065	0.804473	0.800481	0.776496	0.788489
132.089	1050.96	1252.2	1215.63	1233.91			132.089	0.800896	0.803718	0.774486	0.789102
133.012	1053.37	1246.64	1217.16	1231.9			133.012	0.802734	0.800149	0.775461	0.787805
134.012	1054.17	1244.06	1217.2	1230.63			134.012	0.803339	0.798491	0.775488	0.78699
135.012	1054.52	1245.96	1209.83	1227.89			135.012	0.803609	0.799712	0.77079	0.785251
136.012	1050.71	1244.61	1207.24	1225.93			136.012	0.800707	0.798846	0.769144	0.783995
137.012	1049.1	1247.54	1210.8	1229.17			137.012	0.799477	0.800725	0.771412	0.786069
138.012	1048.17	1243.16	1208.26	1225.71			138.012	0.79877	0.797915	0.769791	0.783853
139.012	1048.27	1246.87	1208.42	1227.64			139.012	0.798848	0.800293	0.769894	0.785094
140.012	1049.63	1240.63	1208.25	1224.44			140.012	0.799885	0.796293	0.769783	0.783038
141.012	1048.33	1238.98	1214.91	1226.95			141.012	0.798892	0.795234	0.774029	0.784632
142.012	1048.59	1238.89	1211.57	1225.23			142.012	0.79909	0.795175	0.7719	0.783537
143.012	1049.81	1234.4	1212.6	1223.5			143.012	0.800018	0.792291	0.772558	0.782424
144.012	1047.26	1229.02	1210.1	1219.56			144.012	0.798079	0.78884	0.770965	0.779902
145.012	1045.23	1224.23	1206.78	1215.5			145.012	0.796531	0.785765	0.768846	0.777306
146.012	1047.73	1219.47	1203.18	1211.32			146.012	0.798433	0.782708	0.766554	0.774631
147.012	1045.76	1219.29	1203.7	1211.49			147.012	0.796931	0.782593	0.766887	0.77474
148.012	1045.65	1218.87	1201.93	1210.4			148.012	0.796849	0.782323	0.76576	0.774041
149.012	1042.81	1227.1	1201.37	1214.23			149.012	0.794684	0.787607	0.765398	0.776503
150.012	1043.47	1228.15	1199.6	1213.87			150.012	0.795185	0.78828	0.764274	0.776277
151.196	1041.92	1228.57	1199.17	1213.87			151.196	0.794007	0.788548	0.763998	0.776273
152.21	1038.76	1231.45	1199.12	1215.28			152.21	0.791601	0.790398	0.763966	0.777182
153.235	1041.48	1237.07	1198.69	1217.88			153.235	0.793673	0.794003	0.763691	0.778847
154.262	1037.85	1234.31	1198	1216.15			154.262	0.790909	0.792237	0.763251	0.777744
155.285	1039.53	1234.96	1204.29	1219.62			155.285	0.792184	0.792652	0.76726	0.779956
156.21	1039.34	1236.67	1201.01	1218.84			156.21	0.792037	0.793751	0.765174	0.779462
157.235	1035.17	1232.39	1198.31	1215.35			157.235	0.788865	0.790999	0.763452	0.777226
158.257	1040.31	1227.37	1197.66	1212.51			158.257	0.792778	0.787777	0.763038	0.775407
159.281	1034.85	1224.2	1201.51	1212.86			159.281	0.788619	0.785748	0.765489	0.775618
160.21	1033.96	1224.6	1200.95	1212.78			160.21	0.787944	0.786004	0.765135	0.77557
161.236	1034.34	1222.18	1197.41	1209.8			161.236	0.788229	0.784451	0.762882	0.773666
162.262	1034.78	1221.96	1194.89	1208.42			162.262	0.788567	0.784307	0.761271	0.772789
163.285	1033.08	1227.96	1192.87	1210.42			163.285	0.787268	0.788161	0.759986	0.774073
164.21	1034.45	1227.52	1192.88	1210.2			164.21	0.788312	0.787878	0.759994	0.773936
165.237	1031.36	1228.69	1194.98	1211.84			165.237	0.78596	0.788631	0.761333	0.774982
166.265	1027.98	1226.7	1189.23	1207.97			166.265	0.783386	0.787349	0.75767	0.772509
167.288	1026.15	1229.67	1193.57	1211.62			167.288	0.781992	0.789258	0.760432	0.774845
168.21	1027.58	1222.44	1193.28	1207.86			168.21	0.78308	0.784615	0.760245	0.77243
169.237	1023.82	1223.43	1191.61	1207.52			169.237	0.780211	0.785253	0.759183	0.772218
170.265	1033.86	1221.43	1190.63	1206.03			170.265	0.787865	0.783966	0.75856	0.771263
171.289	1029.31	1221.99	1186.62	1204.31			171.289	0.784395	0.784329	0.756006	0.770167
172.212	1023.29	1219.34	1192.87	1206.1			172.212	0.779808	0.782627	0.759983	0.771305

## Sheet: 0.1 uM ATP (-luciferase)
RAW DATA							NORMALIZED
time (s)	trial 1	trial 2	trial 3	mean			time (s)	trial 1	trial 2	trial 3	mean
0	1205.74	1364.55	1190.04	1253.45			0	0.989254	0.989199	0.999855	0.992769
1.02762	1205.89	1370.87	1189.28	1255.35			1.02762	0.989381	0.993778	0.999214	0.994125
2.05686	1208.71	1364.25	1189.61	1254.19			2.05686	0.991693	0.988976	0.999487	0.993385
3.07997	1209.77	1370.89	1189.72	1256.79			3.07997	0.992556	0.993795	0.999586	0.995312
4.01175	1206.8	1372.82	1187.51	1255.71			4.01175	0.990128	0.995187	0.997727	0.994347
5.03997	1213.17	1372.61	1184.72	1256.83			5.03997	0.995352	0.995034	0.995383	0.995257
6.06525	1218.84	1373.26	1177.06	1256.39			6.06525	1	0.995513	0.988947	0.99482
7.08962	1213.42	1375.4	1177.72	1255.52			7.08962	0.995557	0.997062	0.989502	0.99404
8.01219	1217.55	1374.05	1179.09	1256.9			8.01219	0.998948	0.996084	0.990651	0.995227
9.04098	1211.57	1372.86	1190.21	1258.21			9.04098	0.994039	0.995216	1	0.996418
10.0677	1211.97	1374.14	1183	1256.37			10.0677	0.994368	0.996147	0.993942	0.994819
11.0905	1210.83	1374.27	1181.43	1255.51			11.0905	0.993428	0.996239	0.992617	0.994095
12.0118	1208.53	1379.45	1185.84	1257.94			12.0118	0.991541	1	0.996326	0.995956
13.0362	1204.83	1374.06	1184.09	1254.32			13.0362	0.988507	0.996087	0.99485	0.993148
14.0583	1206.76	1367.11	1184.06	1252.64			14.0583	0.990091	0.991051	0.994824	0.991989
15.0817	1206.7	1365.98	1180.86	1251.18			15.0817	0.990042	0.990232	0.99214	0.990804
16.0118	1179.71	1374.68	1186.81	1247.07			16.0118	0.967902	0.996538	0.997135	0.987192
17.0384	1188.26	1377.49	1185.85	1250.53			17.0384	0.974908	0.998579	0.996328	0.989939
18.0672	1186.01	1374.41	1180.79	1247.07			18.0672	0.973062	0.996343	0.992081	0.987162
19.0915	1184.32	1372.12	1180.92	1245.79			19.0915	0.971682	0.994684	0.99219	0.986186
20.0117	1186.89	1367.49	1174.39	1242.93			20.0117	0.973791	0.99133	0.986704	0.983942
21.0404	1189.46	1370.11	1173.21	1244.26			21.0404	0.975901	0.993226	0.985713	0.984946
22.0689	1190.79	1369.64	1175.51	1245.31			22.0689	0.976984	0.992883	0.987641	0.985836
23.0924	1189.61	1368.08	1178.7	1245.46			23.0924	0.976022	0.991754	0.990323	0.986033
24.0176	1189.93	1365.28	1180.94	1245.38			24.0176	0.976281	0.989724	0.992207	0.986071
25.0428	1185.85	1362.22	1175.57	1241.21			25.0428	0.972935	0.987506	0.987693	0.982712
26.0722	1175.9	1364.82	1173.74	1238.15			26.0722	0.96477	0.989394	0.986156	0.980107
27.0117	1188.89	1363.69	1175.27	1242.62			27.0117	0.975427	0.98857	0.987448	0.983815
28.0117	1187.75	1363.75	1177.37	1242.95			28.0117	0.974496	0.988613	0.989204	0.984104
29.0117	1185.91	1362.66	1169.92	1239.49			29.0117	0.972982	0.987823	0.982948	0.981251
30.0117	1184.46	1360.43	1166.74	1237.21			30.0117	0.971797	0.986212	0.980277	0.979429
31.0117	1182.52	1357.39	1173.7	1237.87			31.0117	0.970201	0.984008	0.986126	0.980112
32.0117	1180.69	1362.68	1171.8	1238.39			32.0117	0.968702	0.987839	0.98453	0.980357
33.0117	1184.12	1363.48	1172.21	1239.94			33.0117	0.971518	0.988418	0.984875	0.981603
34.0117	1180.39	1368.48	1168.82	1239.23			34.0117	0.968454	0.992044	0.98202	0.980839
35.0117	1180.25	1366.62	1172.86	1239.91			35.0117	0.968341	0.990696	0.985414	0.981484
36.0117	1180.08	1359.2	1171.27	1236.85			36.0117	0.968203	0.985315	0.984083	0.9792
37.0067	1179.3	1358.84	1168.7	1235.62			37.0067	0.967565	0.985058	0.981928	0.978184
38.0117	1177.93	1358.7	1172.16	1236.26			38.0117	0.966437	0.984952	0.984826	0.978739
39.0117	1183.12	1359.87	1172.39	1238.46			39.0117	0.970691	0.985801	0.985026	0.980506
40.0117	1181.69	1363.18	1169.71	1238.2			40.0117	0.969522	0.988204	0.982776	0.980167
41.0117	1184.63	1364.39	1178.6	1242.54			41.0117	0.971934	0.989083	0.990239	0.983752
42.0117	1179.92	1362.92	1171.98	1238.28			42.0117	0.968072	0.988013	0.984681	0.980256
43.0117	1181.77	1362.35	1170.55	1238.22			43.0117	0.969588	0.9876	0.98348	0.980223
44.0117	1180.94	1360.8	1176.51	1239.41			44.0117	0.968905	0.986475	0.988481	0.981287
45.0117	1176.03	1365.67	1173.22	1238.31			45.0117	0.964876	0.990009	0.985719	0.980201
46.0117	1180.02	1360.51	1172.32	1237.62			46.0117	0.968148	0.986266	0.984967	0.979794
47.0117	1178.44	1362.39	1172.75	1237.86			47.0117	0.966854	0.987631	0.985326	0.979937
48.0117	1177.63	1364.93	1169.9	1237.49			48.0117	0.966191	0.989474	0.982934	0.979533
49.0117	1185.05	1361.5	1166.97	1237.84			49.0117	0.972279	0.986986	0.98047	0.979912
50.0117	1179.66	1361.32	1166.95	1235.98			50.0117	0.967859	0.986857	0.980453	0.97839
51.0117	1181.17	1355.44	1172.97	1236.53			51.0117	0.969096	0.982593	0.985509	0.979066
52.0117	1186.75	1364.9	1169.9	1240.52			52.0117	0.973676	0.989451	0.982934	0.98202
53.0107	1179.99	1368.08	1175.26	1241.11			53.0107	0.968125	0.991756	0.987435	0.982439
54.0107	1183.24	1363.47	1176.7	1241.14			54.0107	0.970792	0.988412	0.988645	0.982616
55.0117	1176.13	1368.51	1173.85	1239.5			55.0117	0.964965	0.992068	0.986252	0.981095
56.0117	1176.65	1369.3	1172.98	1239.64			56.0117	0.965389	0.992638	0.985522	0.981183
57.0118	1177.98	1355.74	1174.87	1236.2			57.0118	0.966478	0.982808	0.987107	0.978798
58.0117	1174.64	1363.68	1175.22	1237.85			58.0117	0.963742	0.988568	0.987401	0.979904
59.0117	1178.94	1363.49	1172.2	1238.21			59.0117	0.967264	0.988425	0.98486	0.980183
60.0117	1178.88	1365.56	1170.07	1238.17			60.0117	0.967213	0.989925	0.983072	0.98007
61.0117	1174.37	1367.44	1174.13	1238.65			61.0117	0.963516	0.991288	0.986486	0.98043
62.0117	1175.32	1368.77	1171.48	1238.52			62.0117	0.964296	0.992256	0.984257	0.98027
63.0117	1179.26	1364.14	1173.2	1238.86			63.0117	0.967528	0.988896	0.9857	0.980708
64.0117	1180.21	1366.19	1170.16	1238.85			64.0117	0.968306	0.990384	0.98315	0.980613
65.0107	1176.66	1369.94	1174.66	1240.42			65.0107	0.965397	0.993106	0.986935	0.981813
66.0117	1182.54	1367.73	1175.21	1241.83			66.0117	0.970215	0.991502	0.987397	0.983038
67.0117	1182.68	1367.21	1173.66	1241.19			67.0117	0.970336	0.991125	0.986091	0.982517
68.0117	1183.31	1360.99	1171.28	1238.52			68.0117	0.970847	0.986612	0.984093	0.980518
69.0117	1178.59	1360.15	1170.27	1236.34			69.0117	0.966975	0.986009	0.98324	0.978741
70.0067	1174.84	1360.37	1165.62	1233.61			70.0067	0.9639	0.986163	0.979334	0.976466
71.0117	1178.54	1356.07	1167.93	1234.18			71.0117	0.96694	0.983044	0.981279	0.977087
72.0118	1175.74	1362.51	1165.83	1234.69			72.0118	0.96464	0.98772	0.979508	0.977289
73.0117	1177.52	1365.66	1168.51	1237.23			73.0117	0.966101	0.99	0.981766	0.979289
74.0117	1178.55	1360.33	1174.21	1237.7			74.0117	0.96695	0.986132	0.986553	0.979878
75.0117	1177.34	1359.35	1174.57	1237.09			75.0117	0.965955	0.985427	0.986857	0.979413
76.0117	1181.54	1357.15	1174.79	1237.83			76.0117	0.969397	0.983832	0.98704	0.98009
77.0117	1179.35	1358.56	1175.16	1237.69			77.0117	0.967602	0.984853	0.987347	0.979934
78.0067	1175.91	1359.42	1171.74	1235.69			78.0067	0.96478	0.985476	0.98448	0.978245
79.0117	1176.47	1358.08	1174.26	1236.27			79.0117	0.965235	0.984503	0.986593	0.978777
80.0117	1179.65	1359.84	1173.28	1237.59			80.0117	0.967848	0.985782	0.985776	0.979802
81.0057	1176.55	1364.82	1173.38	1238.25			81.0057	0.965307	0.989387	0.985851	0.980182
82.0117	1179.72	1365.29	1173.53	1239.51			82.0117	0.967906	0.989731	0.985979	0.981206
83.0117	1177.51	1359.16	1163.97	1233.55			83.0117	0.966095	0.985286	0.977947	0.976443
84.0117	1176.52	1360.06	1167.98	1234.86			84.0117	0.965282	0.985942	0.981319	0.977514
85.0117	1179.16	1357.97	1168.98	1235.37			85.0117	0.967448	0.984427	0.982154	0.97801
86.0117	1180.8	1358.58	1165.09	1234.82			86.0117	0.96879	0.984867	0.978892	0.977517
87.0117	1174.37	1359.67	1167.26	1233.77			87.0117	0.963514	0.985661	0.980711	0.976629
88.0117	1180.25	1355.3	1173.83	1236.46			88.0117	0.968341	0.982491	0.986236	0.979023
89.0117	1175	1355.44	1164.07	1231.5			89.0117	0.964035	0.982593	0.978031	0.974886
90.0117	1172.42	1354.85	1170.69	1232.65			90.0117	0.961917	0.982163	0.983595	0.975892
91.0117	1171.61	1360.64	1168.35	1233.53			91.0117	0.961248	0.986364	0.981627	0.976413
92.0118	1179.99	1363.82	1169.74	1237.85			92.0118	0.968129	0.988666	0.982797	0.979864
93.0117	1174.78	1361.12	1161.1	1232.33			93.0117	0.963851	0.986705	0.975536	0.975364
94.0117	1175.97	1360.39	1161.7	1232.69			94.0117	0.964831	0.986183	0.97604	0.975685
95.0117	1175.26	1357.86	1166.23	1233.12			95.0117	0.964249	0.984342	0.979846	0.976145
96.0117	1175.08	1357.69	1166.52	1233.1			96.0117	0.964095	0.984222	0.980092	0.976136
97.0117	1172.18	1355.37	1165.31	1230.95			97.0117	0.961724	0.98254	0.979075	0.974446
98.0117	1169.41	1352.72	1168.83	1230.32			98.0117	0.959447	0.980617	0.982035	0.974033
99.0117	1170.64	1365.53	1162.66	1232.94			99.0117	0.96046	0.989905	0.976849	0.975738
100.012	1173.8	1364.79	1165.16	1234.58			100.012	0.963051	0.989367	0.978951	0.977123
101.065	1177.58	1361.26	1162.99	1233.94			101.065	0.966148	0.98681	0.97713	0.976696
102.087	1178.05	1355.21	1164.23	1232.5			102.087	0.966538	0.982426	0.978164	0.975709
103.012	1177.43	1350.39	1163.91	1230.58			103.012	0.966025	0.978934	0.977899	0.974286
104.037	1177.18	1349.21	1164.15	1230.18			104.037	0.965826	0.978073	0.978103	0.974001
105.065	1168.4	1356	1164.22	1229.54			105.065	0.95862	0.982993	0.978155	0.973256
106.088	1169.64	1353.26	1155.77	1226.23			106.088	0.95964	0.981012	0.97106	0.970571
107.012	1166.75	1357.46	1159.77	1227.99			107.012	0.957265	0.984057	0.974421	0.971914
108.039	1169.11	1353.89	1165.69	1229.57			108.039	0.959203	0.981469	0.979394	0.973356
109.067	1176.88	1349.17	1159.7	1228.59			109.067	0.96558	0.978046	0.974362	0.972662
110.085	1174.71	1345.63	1159.86	1226.73			110.085	0.963797	0.975479	0.974496	0.971258
111.012	1166.46	1346.99	1161.78	1225.07			111.012	0.957025	0.976462	0.976107	0.969865
112.037	1166.42	1349.85	1162.34	1226.2			112.037	0.956996	0.978537	0.976578	0.970703
113.066	1167.68	1346.03	1166.72	1226.81			113.066	0.958026	0.975766	0.980262	0.971351
114.09	1166.44	1350.78	1163.66	1226.96			114.09	0.957012	0.979213	0.977693	0.971306
115.014	1164.19	1349.82	1165.38	1226.47			115.014	0.955166	0.978519	0.979138	0.970941
116.041	1168.09	1349.36	1162.71	1226.72			116.041	0.958364	0.978185	0.976889	0.971146
117.069	1167.16	1346.36	1162.35	1225.29			117.069	0.957603	0.976007	0.97659	0.970067
118.086	1164.41	1352.53	1162.36	1226.44			118.086	0.955347	0.980483	0.976597	0.970809
119.012	1167.56	1339.91	1159.55	1222.34			119.012	0.957929	0.971331	0.974234	0.967831
120.035	1166.1	1347.84	1164.09	1226.01			120.035	0.956733	0.97708	0.978046	0.97062
121.064	1171.04	1347.73	1159.58	1226.12			121.064	0.960784	0.977	0.974261	0.970682
122.088	1168.56	1350.94	1160.54	1226.68			122.088	0.958748	0.979331	0.97507	0.971049
123.012	1169.38	1348.59	1160.15	1226.04			123.012	0.95942	0.977629	0.974744	0.970598
124.038	1167.35	1346.69	1157.65	1223.9			124.038	0.957759	0.97625	0.972641	0.968883
125.066	1164.71	1349.59	1158.13	1224.14			125.066	0.955591	0.97835	0.973043	0.968995
126.09	1162.65	1345.92	1158.15	1222.24			126.09	0.953905	0.97569	0.973057	0.967551
127.013	1165.54	1351.31	1158.05	1224.97			127.013	0.956274	0.979595	0.97298	0.969616
128.04	1160.95	1353.29	1160.14	1224.79			128.04	0.952506	0.981029	0.974729	0.969421
129.069	1163.31	1350.55	1163.32	1225.73			129.069	0.954444	0.97905	0.977403	0.970299
130.092	1162.48	1354.35	1163.63	1226.82			130.092	0.953765	0.981803	0.977662	0.971077
131.016	1165.58	1352.07	1164.09	1227.24			131.016	0.956305	0.980144	0.97805	0.9715
132.043	1167.23	1349.68	1160.72	1225.88			132.043	0.957656	0.978419	0.975219	0.970431
133.072	1167.23	1344.51	1162.75	1224.83			133.072	0.957658	0.974666	0.976929	0.969751
134.095	1160.01	1346.32	1156.37	1220.9			134.095	0.951733	0.97598	0.971566	0.966426
135.018	1167.67	1352.65	1160.78	1227.03			135.018	0.958021	0.98057	0.975269	0.971287
136.046	1159.25	1354.81	1161.16	1225.07			136.046	0.951113	0.982134	0.975588	0.969612
137.074	1161.59	1356.17	1156.55	1224.77			137.074	0.953029	0.98312	0.971717	0.969289
138.097	1159.24	1354.38	1160.49	1224.7			138.097	0.951101	0.981824	0.975023	0.969316
139.022	1159.68	1353.78	1159.95	1224.47			139.022	0.951464	0.981391	0.97457	0.969142
140.048	1158.21	1356.1	1161.82	1225.38			140.048	0.950262	0.983068	0.976139	0.969823
141.077	1157.72	1354.32	1157	1223.01			141.077	0.949856	0.981777	0.972095	0.96791
142.013	1162.76	1349.84	1157.45	1223.35			142.013	0.953993	0.978533	0.972473	0.968333
143.036	1161.57	1346.88	1160.07	1222.84			143.036	0.953017	0.976387	0.974668	0.968024
144.063	1157.93	1353.62	1160.39	1223.98			144.063	0.950028	0.981273	0.974946	0.968749
145.091	1161.97	1350.53	1154.39	1222.3			145.091	0.953347	0.979032	0.969898	0.967426
146.017	1158.15	1338.6	1158.12	1218.29			146.017	0.950207	0.970381	0.973036	0.964541
147.04	1161.88	1344.64	1151.98	1219.5			147.04	0.953269	0.974758	0.967873	0.9653
148.065	1162.52	1341.92	1158.5	1220.98			148.065	0.953792	0.972792	0.973356	0.966646
149.094	1162.57	1344.51	1159.99	1222.35			149.094	0.953831	0.974669	0.974601	0.967701
150.021	1160.84	1349.34	1161.89	1224.02			150.021	0.952418	0.978165	0.9762	0.968928
151.046	1162.3	1343.22	1162.29	1222.61			151.046	0.953616	0.973736	0.976538	0.967963
152.073	1156.72	1343.01	1156.58	1218.77			152.073	0.94904	0.973578	0.971738	0.964785
153.012	1156.81	1336.8	1152.29	1215.3			153.012	0.949107	0.969078	0.968138	0.962108
154.041	1152.91	1335.53	1156.83	1215.09			154.041	0.94591	0.968158	0.971946	0.962004
155.059	1161.47	1341.75	1154.48	1219.23			155.059	0.952929	0.972667	0.969976	0.96519
156.085	1159.84	1338.6	1155.99	1218.14			156.085	0.951595	0.97038	0.971245	0.964407
157.012	1160.41	1338.07	1153.81	1217.43			157.012	0.952063	0.969999	0.969409	0.963824
158.04	1156.33	1337.09	1156.15	1216.52			158.04	0.948711	0.969285	0.971379	0.963125
159.064	1149.09	1339.41	1154.1	1214.2			159.064	0.942773	0.970972	0.969657	0.961134
160.091	1155.09	1345.32	1158.6	1219.67			160.091	0.9477	0.975251	0.973435	0.965462
161.016	1150.51	1342.62	1160.33	1217.82			161.016	0.943942	0.973296	0.974891	0.964043
162.043	1160.06	1344.05	1154.88	1219.67			162.043	0.951776	0.974338	0.970314	0.965476
163.067	1156.75	1338.35	1157.62	1217.57			163.067	0.94906	0.970202	0.97261	0.963957
164.093	1155.29	1334.92	1156.06	1215.42			164.093	0.947866	0.967717	0.971301	0.962295
165.019	1155.48	1342.19	1151.69	1216.45			165.019	0.948016	0.972986	0.967634	0.962879
166.047	1162.25	1339.93	1147.31	1216.5			166.047	0.953575	0.971344	0.963952	0.962957
167.072	1154.21	1337.33	1153.46	1215			167.072	0.94698	0.969463	0.969115	0.961853
168.098	1150.35	1338.91	1155.42	1214.89			168.098	0.943805	0.970606	0.97077	0.961727
169.024	1149.24	1334.71	1160.16	1214.7			169.024	0.942901	0.967567	0.974746	0.961738
170.052	1148.68	1335.14	1155.67	1213.17			170.052	0.942443	0.967877	0.970978	0.960433
171.076	1149.13	1335.17	1158.36	1214.22			171.076	0.94281	0.967897	0.973234	0.961314
172.012	1153.54	1336.68	1155.29	1215.17			172.012	0.946422	0.968995	0.970657	0.962025
173.037	1150.18	1339.73	1154.68	1214.86			173.037	0.943668	0.971204	0.970142	0.961671
174.065	1156.98	1329.87	1156.38	1214.41			174.065	0.949249	0.964055	0.971572	0.961625

## Sheet: 1 uM ATP (-luciferase)
RAW DATA							NORMALIZED
time (s)	trial 1	trial 2	trial 3	mean			time (s)	trial 1	trial 2	trial 3	mean
0	1313.51	1183.94	1284.55	1260.67			0	0.996894	0.994818	1	0.997237
1.03583	1310.87	1186.67	1277.88	1258.48			1.03583	0.994888	0.997114	0.994811	0.995605
2.06386	1307.01	1180.63	1277.84	1255.16			2.06386	0.991957	0.992041	0.994774	0.992924
3.08292	1310.73	1175.35	1278.93	1255			3.08292	0.994784	0.987602	0.995623	0.99267
4.01181	1314.82	1180.96	1280.84	1258.87			4.01181	0.997883	0.992312	0.99711	0.995768
5.03797	1310.09	1190.11	1278.57	1259.59			5.03797	0.9943	1	0.995347	0.996549
6.0668	1308.2	1182.13	1270.68	1253.67			6.0668	0.992866	0.993299	0.989202	0.991789
7.09016	1311.39	1176.13	1276.22	1254.58			7.09016	0.995287	0.988253	0.993513	0.992351
8.01306	1310.87	1180.07	1275.63	1255.52			8.01306	0.99489	0.991562	0.993058	0.99317
9.03907	1317.61	1185.2	1273.52	1258.77			9.03907	1	0.995874	0.991413	0.995763
10.0666	1313.78	1189.28	1279.7	1260.92			10.0666	0.997099	0.9993	0.996224	0.997541
11.0908	1311.48	1186.67	1273.84	1257.33			11.0908	0.995353	0.997114	0.991664	0.99471
12.0118	1315.26	1187.01	1272.07	1258.11			12.0118	0.998218	0.997399	0.990285	0.995301
13.0321	1313.45	1184.61	1278.91	1258.99			13.0321	0.996847	0.995383	0.995613	0.995948
14.0598	1310.85	1177.74	1274.97	1254.52			14.0598	0.994869	0.989606	0.99254	0.992339
15.0826	1312.93	1182.41	1270.6	1255.32			15.0826	0.996454	0.993534	0.989142	0.993043
16.0118	1309.59	1175.97	1270.08	1251.88			16.0118	0.993917	0.988121	0.988737	0.990258
17.0375	1311.04	1169.63	1271.28	1250.65			17.0375	0.995016	0.982796	0.989668	0.98916
18.0661	1313.17	1168.42	1276.49	1252.69			18.0661	0.996632	0.981779	0.993729	0.990713
19.0893	1308.89	1175.51	1268	1250.8			19.0893	0.993388	0.987736	0.98712	0.989415
20.0118	1309.79	1167.74	1268.57	1248.7			20.0118	0.994067	0.981203	0.987558	0.987609
21.0376	1307.68	1169.79	1269.79	1249.08			21.0376	0.992469	0.982924	0.988506	0.987966
22.0659	1309.9	1169.81	1273.05	1250.92			22.0659	0.994154	0.982943	0.991047	0.989381
23.0903	1307.7	1167.9	1273.79	1249.8			23.0903	0.992484	0.98134	0.991625	0.988483
24.0127	1309.21	1163.29	1268.79	1247.1			24.0127	0.993632	0.977462	0.987729	0.986275
25.0393	1308.69	1162.59	1269.98	1247.09			25.0393	0.993236	0.97688	0.988654	0.986257
26.0684	1308.97	1163.88	1262.91	1245.25			26.0684	0.993446	0.977962	0.983156	0.984855
27.0917	1310.53	1161.58	1261.98	1244.7			27.0917	0.99463	0.976029	0.98243	0.984363
28.0117	1302.13	1164.92	1261.84	1242.96			28.0117	0.988255	0.978836	0.982317	0.983136
29.0117	1302.31	1165.04	1267.08	1244.81			29.0117	0.988394	0.978933	0.9864	0.984575
30.0067	1303.26	1162.19	1263.8	1243.08			30.0067	0.989115	0.97654	0.983848	0.983168
31.0118	1303.17	1162.7	1265.6	1243.82			31.0118	0.989045	0.976971	0.985248	0.983754
32.0118	1300.68	1155.26	1265.19	1240.38			32.0118	0.987157	0.970715	0.984927	0.980933
33.0117	1303.62	1157.75	1265.49	1242.29			33.0117	0.989388	0.972809	0.985162	0.982453
34.0118	1305.37	1161.36	1260.02	1242.25			34.0118	0.990712	0.975845	0.980904	0.982487
35.0117	1305.39	1161.09	1261.97	1242.81			35.0117	0.990727	0.97562	0.982418	0.982922
36.0117	1302.31	1156.96	1261.76	1240.34			36.0117	0.988388	0.972143	0.982256	0.980929
37.0117	1305.17	1161.59	1264.52	1243.76			37.0117	0.990566	0.97604	0.984409	0.983672
38.0117	1306.7	1160.06	1263.89	1243.55			38.0117	0.991726	0.974754	0.983915	0.983465
39.0118	1296.76	1160.7	1267.48	1241.65			39.0118	0.984183	0.975292	0.986713	0.982063
40.0068	1292.41	1159.47	1256.05	1235.97			40.0068	0.98088	0.974252	0.977809	0.977647
41.0118	1304.98	1160.74	1255.03	1240.25			41.0118	0.99042	0.975322	0.977019	0.98092
42.0118	1301.25	1160.76	1252.33	1238.11			42.0118	0.987585	0.97534	0.974915	0.97928
43.0118	1302.02	1153.45	1254.04	1236.5			43.0118	0.98817	0.969198	0.976248	0.977872
44.0058	1297.38	1154.86	1258.26	1236.83			44.0058	0.984646	0.970381	0.979532	0.978186
45.0118	1304.6	1153.21	1259.01	1238.94			45.0118	0.990126	0.968996	0.980118	0.979747
46.0117	1298.65	1155.34	1252.71	1235.57			46.0117	0.985618	0.970788	0.975215	0.977207
47.0117	1298.94	1155.2	1254.8	1236.31			47.0117	0.985834	0.970673	0.976838	0.977782
48.0118	1298.1	1158.43	1255.93	1237.49			48.0118	0.985199	0.973381	0.97772	0.978766
49.0118	1295.72	1157.24	1258.67	1237.21			49.0118	0.983387	0.972385	0.979851	0.978541
50.0107	1294.48	1161.63	1260.4	1238.84			50.0107	0.982453	0.976071	0.9812	0.979908
51.0107	1305.15	1158.06	1260.22	1241.14			51.0107	0.990551	0.973074	0.981058	0.981561
52.0107	1307.97	1158.68	1255.51	1240.72			52.0107	0.992691	0.973597	0.977393	0.981227
53.0117	1302.59	1160.52	1256.6	1239.9			53.0117	0.988606	0.975137	0.978245	0.980663
54.0118	1299.38	1156.13	1256.81	1237.44			54.0118	0.986172	0.971448	0.978407	0.978676
55.0117	1297.9	1154.31	1258.81	1237.01			55.0117	0.985045	0.969923	0.97996	0.978309
56.0118	1294.73	1160.44	1258.23	1237.8			56.0118	0.982641	0.975076	0.979512	0.979076
57.0118	1297.77	1154.21	1257.28	1236.42			57.0118	0.984948	0.969835	0.978771	0.977851
58.0118	1300.77	1156.9	1257.43	1238.37			58.0118	0.987225	0.972101	0.978886	0.979404
59.0108	1301.14	1159.35	1253.62	1238.04			59.0108	0.987504	0.974158	0.975922	0.979194
60.0118	1297.95	1160.56	1257.34	1238.62			60.0118	0.985083	0.975172	0.978819	0.979692
61.0108	1298.32	1159.52	1258.71	1238.85			61.0108	0.985362	0.974301	0.979884	0.979849
62.0118	1301.4	1159.1	1261.32	1240.61			62.0118	0.987703	0.973944	0.981912	0.981186
63.0108	1305.46	1157.44	1261.13	1241.35			63.0108	0.990784	0.972555	0.981768	0.981702
64.0118	1299.55	1156.52	1258.31	1238.13			64.0118	0.986299	0.971776	0.979571	0.979215
65.0117	1298.2	1159.99	1259.12	1239.11			65.0117	0.985271	0.974698	0.980205	0.980058
66.0117	1298.7	1157.26	1256.56	1237.51			66.0117	0.985656	0.9724	0.978208	0.978755
67.0118	1293.46	1159.42	1253.55	1235.48			67.0118	0.981673	0.974215	0.975867	0.977252
68.0117	1295.91	1159.44	1257.59	1237.65			68.0117	0.983536	0.974233	0.979012	0.978927
69.0118	1297.58	1160.64	1256.67	1238.29			69.0118	0.984798	0.975242	0.978294	0.979445
70.0108	1296.68	1159.78	1249.09	1235.18			70.0108	0.984117	0.974513	0.972393	0.977008
71.0118	1296.99	1154.68	1254.64	1235.44			71.0118	0.984354	0.970234	0.976714	0.977101
72.0118	1295.57	1156.56	1255.16	1235.76			72.0118	0.983276	0.971813	0.977122	0.977404
73.0118	1293.38	1155.93	1256.39	1235.24			73.0118	0.981618	0.971286	0.97808	0.976995
74.0118	1297.92	1154.8	1252.03	1234.92			74.0118	0.98506	0.970337	0.974686	0.976694
75.0118	1293.74	1161.02	1252.3	1235.68			75.0118	0.981886	0.975557	0.97489	0.977444
76.0118	1291.98	1154.5	1250.27	1232.25			76.0118	0.980552	0.970083	0.973314	0.974649
77.0118	1294.97	1160.21	1251.2	1235.46			77.0118	0.982819	0.974876	0.974034	0.977243
78.0117	1297.85	1156.85	1252.01	1235.57			78.0117	0.985005	0.972051	0.974664	0.97724
79.0118	1298.38	1160.13	1251.99	1236.83			79.0118	0.985409	0.974811	0.974656	0.978292
80.0118	1299.88	1159.69	1252.27	1237.28			80.0118	0.986546	0.974439	0.974869	0.978618
81.0117	1298.22	1158.43	1256.03	1237.56			81.0117	0.985291	0.973381	0.977794	0.978822
82.0117	1299.05	1154.6	1256.88	1236.84			82.0117	0.985916	0.970162	0.978455	0.978178
83.0118	1301.8	1153.87	1248.6	1234.76			83.0118	0.988007	0.969547	0.972015	0.976523
84.0117	1295.78	1155.1	1251.46	1234.11			84.0117	0.983434	0.970582	0.97424	0.976085
85.0118	1293.77	1154.29	1247.69	1231.92			85.0118	0.981912	0.9699	0.971305	0.974372
86.0058	1294.91	1156.54	1254.97	1235.48			86.0058	0.982779	0.971797	0.976974	0.977183
87.0117	1296.83	1159.08	1254.63	1236.84			87.0117	0.984231	0.973925	0.976708	0.978288
88.0118	1293.77	1156.89	1253.88	1234.85			88.0118	0.981912	0.972091	0.97612	0.976708
89.0118	1290.73	1156.28	1251.65	1232.89			89.0118	0.979601	0.971574	0.974392	0.975189
90.0118	1298.14	1156.63	1256.47	1237.08			90.0118	0.985227	0.97187	0.978138	0.978412
91.0118	1295.47	1152.87	1249.36	1232.57			91.0118	0.983199	0.968707	0.972607	0.974837
92.0117	1297.92	1153.44	1253.23	1234.86			92.0117	0.98506	0.969194	0.975616	0.976623
93.0118	1297.69	1149.7	1251.05	1232.81			93.0118	0.984885	0.966043	0.973923	0.97495
94.0117	1297.76	1151.24	1250.33	1233.11			94.0117	0.984939	0.967337	0.973358	0.975211
95.0118	1296.2	1149.55	1249.82	1231.86			95.0118	0.983757	0.965921	0.972959	0.974212
96.0118	1298.49	1150.51	1251.41	1233.47			96.0118	0.985493	0.96673	0.974199	0.975474
97.0118	1298.14	1149.32	1249.71	1232.39			97.0118	0.985229	0.965724	0.97288	0.974611
98.0118	1296.4	1158.79	1256.22	1237.14			98.0118	0.98391	0.973683	0.977946	0.978513
99.0735	1297.59	1157.45	1254.66	1236.57			99.0735	0.98481	0.972561	0.976729	0.978033
100.111	1292.51	1152.36	1254.52	1233.13			100.111	0.980954	0.96828	0.976622	0.975285
101.139	1285.97	1154.63	1253.59	1231.4			101.139	0.975989	0.970192	0.975898	0.974026
102.162	1283.84	1150.07	1248.6	1227.5			102.162	0.974372	0.966358	0.972012	0.970914
103.189	1288.48	1153.31	1252.34	1231.38			103.189	0.977899	0.969083	0.974923	0.973968
104.115	1289.93	1151.21	1251.72	1230.95			104.115	0.979	0.96732	0.974439	0.973586
105.143	1289.08	1153.05	1250.09	1230.74			105.143	0.978353	0.968864	0.973175	0.973464
106.165	1288.75	1148.75	1244.31	1227.27			106.165	0.9781	0.965253	0.968672	0.970675
107.191	1284.2	1152.93	1251.07	1229.4			107.191	0.974647	0.968759	0.973934	0.972447
108.117	1283.88	1152.83	1254.12	1230.28			108.117	0.974404	0.968675	0.976313	0.973131
109.144	1281.49	1156.85	1250.92	1229.75			109.144	0.972592	0.972055	0.97382	0.972822
110.166	1285.47	1154.91	1255.69	1232.03			110.166	0.975615	0.970425	0.977535	0.974525
111.193	1280.35	1155.03	1255.46	1230.28			111.193	0.971727	0.970524	0.977354	0.973202
112.119	1286.5	1152.27	1250.94	1229.9			112.119	0.976389	0.968205	0.973833	0.972809
113.147	1289	1148.95	1248.47	1228.81			113.147	0.978288	0.965419	0.971912	0.971873
114.171	1290.41	1149.21	1248.4	1229.34			114.171	0.979358	0.965635	0.971856	0.972283
115.197	1286.59	1150.2	1252.45	1229.75			115.197	0.976459	0.966469	0.975011	0.972646
116.123	1281.9	1144.99	1251.18	1226.02			116.123	0.972905	0.96209	0.97402	0.969672
117.111	1287.86	1155.02	1250.66	1231.18			117.111	0.977421	0.970519	0.973617	0.973853
118.111	1283.14	1150.88	1248.11	1227.38			118.111	0.973845	0.967034	0.971634	0.970838
119.111	1285.41	1157.51	1243.42	1228.78			119.111	0.975567	0.97261	0.967985	0.972054
120.111	1289.2	1154.04	1242.85	1228.7			120.111	0.978446	0.969696	0.967537	0.971893
121.111	1287.29	1148.36	1243.57	1226.4			121.111	0.976992	0.964919	0.968094	0.970002
122.111	1283.08	1146.11	1249.76	1226.31			122.111	0.973797	0.963026	0.972913	0.969912
123.111	1286.83	1146.88	1244.84	1226.19			123.111	0.976645	0.963682	0.969086	0.969804
124.111	1284.25	1148.98	1252.38	1228.54			124.111	0.974685	0.965442	0.974954	0.971694
125.111	1289.69	1147.72	1248.48	1228.63			125.111	0.978818	0.964388	0.971922	0.971709
126.111	1291.42	1147.43	1252.39	1230.41			126.111	0.980127	0.964142	0.974962	0.973077
127.111	1291.25	1145.84	1249.99	1229.03			127.111	0.98	0.962806	0.973096	0.971967
128.111	1287.38	1150.38	1246.23	1227.99			128.111	0.977057	0.966619	0.970167	0.971281
129.111	1282.17	1145.14	1244.14	1223.82			129.111	0.973105	0.962218	0.968543	0.967955
130.111	1286.61	1148.35	1235.2	1223.38			130.111	0.976474	0.964913	0.96158	0.967656
131.111	1283.07	1152.03	1241.3	1225.47			131.111	0.973788	0.968009	0.966329	0.969375
132.111	1287.09	1147.52	1237.85	1224.16			132.111	0.976842	0.96422	0.963645	0.968236
133.111	1286.47	1149.09	1233.2	1222.92			133.111	0.976372	0.965535	0.960029	0.967312
134.111	1287.38	1144.84	1237.92	1223.38			134.111	0.977063	0.961961	0.963697	0.967574
135.111	1286.49	1146.16	1240.43	1224.36			135.111	0.976385	0.963071	0.965657	0.968371
136.111	1284.9	1148.77	1238.7	1224.12			136.111	0.975177	0.965264	0.964307	0.968249
137.111	1288.29	1146.28	1240.77	1225.11			137.111	0.977751	0.963171	0.96592	0.968948
138.111	1289.27	1146.13	1240.81	1225.4			138.111	0.978495	0.963047	0.965947	0.969163
139.111	1289.62	1151.6	1244.59	1228.6			139.111	0.978761	0.967642	0.96889	0.971764
140.111	1291.79	1145.61	1236.01	1224.47			140.111	0.980406	0.962608	0.962214	0.96841
141.111	1286.61	1151.15	1234.57	1224.11			141.111	0.976474	0.967263	0.961088	0.968275
142.111	1290.11	1151.49	1229.76	1223.79			142.111	0.979131	0.967555	0.957349	0.968012
143.111	1282.98	1150.15	1237.42	1223.52			143.111	0.973721	0.966427	0.963308	0.967819
144.111	1281.25	1147.19	1246.22	1224.89			144.111	0.972408	0.96394	0.970161	0.968836
145.111	1280.96	1151.41	1237.36	1223.24			145.111	0.972192	0.967482	0.963263	0.967646
146.111	1279.01	1153.21	1233.19	1221.81			146.111	0.970708	0.969001	0.960017	0.966575
147.111	1283.29	1150.95	1232.09	1222.11			147.111	0.973955	0.967093	0.959157	0.966735
148.111	1284.4	1150.32	1232.54	1222.42			148.111	0.974799	0.96657	0.959509	0.966959
149.111	1283.56	1150.92	1234.81	1223.09			149.111	0.97416	0.96707	0.961276	0.967502
150.111	1281.68	1149.13	1236.32	1222.37			150.111	0.972731	0.965568	0.96245	0.966916
151.111	1283.92	1149.81	1229.04	1220.92			151.111	0.974433	0.966138	0.956784	0.965785
152.198	1284.89	1149.52	1234.96	1223.12			152.198	0.975169	0.965896	0.961395	0.967487
153.238	1283.22	1145.24	1231.69	1220.05			153.238	0.973907	0.962302	0.958847	0.965019
154.264	1286.49	1145.7	1238.22	1223.47			154.264	0.976389	0.962688	0.963931	0.967669
155.287	1281.45	1146.74	1238.72	1222.31			155.287	0.972562	0.96356	0.964324	0.966815
156.31	1273.72	1145.45	1227.08	1215.42			156.31	0.966693	0.962478	0.955261	0.961477
157.238	1272.33	1150.41	1232.77	1218.51			157.238	0.96564	0.966648	0.959694	0.963994
158.264	1277.4	1141.69	1236.24	1218.44			158.264	0.969484	0.959315	0.962391	0.96373
159.292	1278.27	1135.4	1235.14	1216.27			159.292	0.970147	0.954034	0.961539	0.961906
160.315	1274.32	1139.23	1235.57	1216.37			160.315	0.967151	0.957248	0.961866	0.962088
161.238	1277.74	1140.19	1234.29	1217.4			161.238	0.969741	0.958054	0.96087	0.962888
162.264	1277.11	1139.93	1226.66	1214.57			162.264	0.96927	0.957838	0.954938	0.960682
163.293	1273.34	1141.15	1225.16	1213.22			163.293	0.966403	0.958861	0.95377	0.959678
164.316	1271.85	1142.63	1224.86	1213.11			164.316	0.96527	0.960109	0.953532	0.959637
165.239	1276.14	1142.34	1224.69	1214.39			165.239	0.968528	0.959861	0.953398	0.960596
166.265	1271.32	1137.57	1229.38	1212.76			166.265	0.96487	0.955857	0.957049	0.959259
167.293	1278.11	1142.06	1229.9	1216.69			167.293	0.970023	0.959625	0.957458	0.962369
168.317	1272.7	1143.09	1230.59	1215.46			168.317	0.965921	0.960489	0.957991	0.961467
169.241	1275.81	1136.04	1232.33	1214.73			169.241	0.968278	0.954571	0.959344	0.960731
170.267	1275.64	1136.14	1228.36	1213.38			170.267	0.968154	0.954657	0.956253	0.959688
171.296	1265.32	1138.75	1229.51	1211.19			171.296	0.960314	0.956848	0.957152	0.958105
172.32	1264.21	1132.14	1229.57	1208.64			172.32	0.959474	0.951294	0.957201	0.95599
173.243	1270.17	1135.38	1225.14	1210.23			173.243	0.964001	0.95401	0.953748	0.957253

## Sheet: 10 uM ATP (-luciferase)
RAW DATA							NORMALIZED
time (s)	trial 1	trial 2	trial 3	mean			time (s)	trial 1	trial 2	trial 3	mean
0	1302.16	996.673	994.087	1148.12			0	0.993403	0.842801	1	0.996701
1.05941	1308.62	988.559	988.72	1148.67			1.05941	0.998331	0.835939	0.994601	0.996466
2.08764	1308.47	991.652	979.74	1144.11			2.08764	0.998221	0.838555	0.985567	0.991894
3.01297	1310.67	995.871	983.007	1146.84			3.01297	0.999893	0.842123	0.988853	0.994373
4.03617	1310.81	995.21	986.223	1148.52			4.03617	1	0.841564	0.992089	0.996044
5.06185	1309.7	996.646	982.563	1146.13			5.06185	0.999151	0.842778	0.988407	0.993779
6.09056	1304.65	994.657	982.949	1143.8			6.09056	0.995303	0.841096	0.988795	0.992049
7.01624	1303.45	997.955	984.086	1143.77			7.01624	0.994389	0.843885	0.989939	0.992164
8.0399	1305.38	996.387	981.752	1143.56			8.0399	0.995856	0.842558	0.987591	0.991723
9.06648	1304.07	997.537	984.497	1144.28			9.06648	0.994858	0.843531	0.990352	0.992605
10.0951	1307.24	1003.94	994.004	1150.62			10.0951	0.99728	0.848944	0.999916	0.998598
11.021	1306.5	1181.55	983.848	1145.17			11.021	0.996714	0.999137	0.989699	0.993207
12.0469	1309.18	1182.57	986.097	1147.64			12.0469	0.99876	1	0.991962	0.995361
13.071	1304.65	1181.65	982.06	1143.35			13.071	0.995301	0.999218	0.987901	0.991601
14.0112	1303.03	1179.85	987.743	1145.39			14.0112	0.994065	0.997694	0.993618	0.993841
15.0389	1307.45	996.411	983.887	1145.67			15.0389	0.997441	0.842579	0.989739	0.99359
16.0625	1303.58	979.063	973.091	1138.33			16.0625	0.994484	0.82791	0.978879	0.986681
17.0882	1305.48	984.38	977.309	1141.39			17.0882	0.995936	0.832406	0.983122	0.989529
18.0141	1304	984.614	980.302	1142.15			18.0141	0.994809	0.832604	0.986132	0.99047
19.0422	1303.89	988.356	980.794	1142.34			19.0422	0.994725	0.835768	0.986627	0.990676
20.0655	1300.95	987.989	980.961	1140.96			20.0655	0.992482	0.835458	0.986795	0.989638
21.0931	1302.88	992.314	983.98	1143.43			21.0931	0.993952	0.839115	0.989832	0.991892
22.0182	1307.03	989.662	981.837	1144.43			22.0182	0.997118	0.836872	0.987677	0.992397
23.0409	1298.93	992.688	980.871	1139.9			23.0409	0.990937	0.839431	0.986705	0.988821
24.0643	1297.57	991.453	981.238	1139.41			24.0643	0.989903	0.838386	0.987074	0.988489
25.0899	1296.21	986.118	981.589	1138.9			25.0899	0.988862	0.833875	0.987427	0.988144
26.0161	1290.09	987.033	980.895	1135.49			26.0161	0.984193	0.834649	0.986729	0.985461
27.0458	1292.07	990.308	979.684	1135.87			27.0458	0.985702	0.837418	0.985511	0.985606
28.0122	1298.79	989.389	976.928	1137.86			28.0122	0.99083	0.836641	0.982738	0.986784
29.0112	1294.35	989.511	984.182	1139.27			29.0112	0.987445	0.836744	0.990036	0.98874
30.0111	1293.55	988.357	978.283	1135.91			30.0111	0.986831	0.835768	0.984102	0.985466
31.0112	1288.74	985.949	979.645	1134.19			31.0112	0.983165	0.833732	0.985471	0.984318
32.0111	1290.35	983.742	979.129	1134.74			32.0111	0.984393	0.831866	0.984953	0.984673
33.0111	1289.79	983.69	976.923	1133.35			33.0111	0.983962	0.831822	0.982733	0.983348
34.0111	1285.88	985.38	978.899	1132.39			34.0111	0.980983	0.833251	0.984721	0.982852
35.0111	1282.57	982.989	977.759	1130.17			35.0111	0.978462	0.831229	0.983574	0.981018
36.0111	1288.32	987.697	977.971	1133.14			36.0111	0.982841	0.83521	0.983788	0.983314
37.0121	1284.67	987.064	975.236	1129.95			37.0121	0.980058	0.834675	0.981037	0.980547
38.0111	1285.23	984.329	979.737	1132.48			38.0111	0.980485	0.832362	0.985564	0.983025
39.0122	1292.87	986.494	973.649	1133.26			39.0122	0.986316	0.834193	0.97944	0.982878
40.0112	1295.42	984.056	974.841	1135.13			40.0112	0.988259	0.832132	0.980639	0.984449
41.0111	1292.35	981.221	973.312	1132.83			41.0111	0.985921	0.829734	0.9791	0.982511
42.0061	1290.16	979.427	973.397	1131.78			42.0061	0.98425	0.828217	0.979186	0.981718
43.0111	1285.92	978.864	973.87	1129.9			43.0111	0.981014	0.827741	0.979663	0.980338
44.0071	1284.15	983.373	970.728	1127.44			44.0071	0.979665	0.831555	0.976502	0.978084
45.0111	1278.29	978.533	981.192	1129.74			45.0111	0.975195	0.827461	0.987028	0.981111
46.0111	1282.79	980.413	977.897	1130.34			46.0111	0.978628	0.829051	0.983713	0.98117
47.0071	1284.98	979.617	979.983	1132.48			47.0071	0.980298	0.828378	0.985812	0.983055
48.0111	1285.79	983.38	981.652	1133.72			48.0111	0.980913	0.83156	0.98749	0.984201
49.0122	1285.29	978.625	978.626	1131.96			49.0122	0.980531	0.82754	0.984447	0.982489
50.0112	1281.38	979.615	977.775	1129.58			50.0112	0.977554	0.828377	0.983591	0.980572
51.0111	1287.44	979.014	972.981	1130.21			51.0111	0.982173	0.827868	0.978768	0.98047
52.0112	1287.62	980.487	975.751	1131.68			52.0112	0.982307	0.829114	0.981554	0.981931
53.0111	1288.64	980.026	976.567	1132.6			53.0111	0.983089	0.828724	0.982376	0.982732
54.0111	1287.53	976.911	974.253	1130.89			54.0111	0.982244	0.82609	0.980048	0.981146
55.0112	1283.04	977.905	974.421	1128.73			55.0112	0.978818	0.82693	0.980217	0.979518
56.0071	1286.75	978.408	975.46	1131.1			56.0071	0.981645	0.827355	0.981262	0.981453
57.0112	1284.69	979.999	976.215	1130.46			57.0112	0.980079	0.828701	0.982021	0.98105
58.0112	1288.81	981.066	976.566	1132.69			58.0112	0.983215	0.829603	0.982374	0.982794
59.0111	1276.61	981.868	977.372	1126.99			59.0111	0.973911	0.830281	0.983186	0.978548
60.0111	1281.13	979.719	977.955	1129.54			60.0111	0.977361	0.828464	0.983771	0.980566
61.0111	1287.08	973.298	976.01	1131.55			61.0111	0.981899	0.823035	0.981815	0.981857
62.0111	1288.7	977.924	974.505	1131.6			62.0111	0.983136	0.826946	0.980301	0.981719
63.0111	1290.86	977.74	973.76	1132.31			63.0111	0.98478	0.82679	0.979551	0.982166
64.0112	1288.09	979.68	970.471	1129.28			64.0112	0.982665	0.828431	0.976243	0.979454
65.0111	1287.27	978.909	968.414	1127.84			65.0111	0.982042	0.827779	0.974174	0.978108
66.0112	1284.93	979.946	974.437	1129.69			66.0112	0.980262	0.828656	0.980233	0.980247
67.0111	1285.87	979.274	977.511	1131.69			67.0111	0.980972	0.828088	0.983325	0.982148
68.0111	1280.53	977.839	977.498	1129.01			68.0111	0.976898	0.826874	0.983312	0.980105
69.0112	1278.8	980.385	975.204	1127			69.0112	0.975582	0.829027	0.981004	0.978293
70.0111	1283.33	977.794	972.804	1128.07			70.0111	0.97904	0.826837	0.97859	0.978815
71.0112	1278.93	977.287	969.987	1124.46			71.0112	0.975681	0.826408	0.975756	0.975719
72.0112	1286.37	978.995	972.005	1129.19			72.0112	0.981359	0.827852	0.977787	0.979573
73.0111	1280.91	977.733	970.68	1125.8			73.0111	0.977195	0.826785	0.976454	0.976824
74.0111	1280.08	974.458	970.351	1125.21			74.0111	0.976555	0.824015	0.976122	0.976338
75.0112	1279.91	973.713	970.899	1125.4			75.0112	0.976429	0.823385	0.976674	0.976551
76.0062	1285.97	973.752	967.728	1126.85			76.0062	0.981052	0.823418	0.973484	0.977268
77.0071	1285.7	978.594	971.87	1128.78			77.0071	0.980846	0.827513	0.97765	0.979248
78.0071	1285.31	980.404	973.146	1129.23			78.0071	0.98055	0.829043	0.978934	0.979742
79.0111	1282.53	974.209	975.446	1128.99			79.0111	0.978429	0.823805	0.981248	0.979838
80.0112	1288.83	977.799	975.273	1132.05			80.0112	0.98323	0.826841	0.981073	0.982152
81.0122	1284.77	977.976	971.256	1128.02			81.0122	0.98014	0.82699	0.977033	0.978586
82.0111	1283.38	973.911	968.663	1126.02			82.0111	0.97908	0.823553	0.974424	0.976752
83.0122	1283.24	977.152	973.189	1128.22			83.0122	0.978971	0.826293	0.978977	0.978974
84.0111	1284.96	970.941	968.783	1126.87			84.0111	0.980285	0.821041	0.974545	0.977415
85.0111	1287.14	977.55	971.289	1129.22			85.0111	0.981946	0.82663	0.977066	0.979506
86.0111	1285.02	977.444	971.918	1128.47			86.0111	0.980327	0.826541	0.977699	0.979013
87.0111	1284.11	977.007	975.901	1130.01			87.0111	0.979633	0.826171	0.981706	0.980669
88.0111	1282.06	975.091	968.48	1125.27			88.0111	0.978071	0.824551	0.97424	0.976155
89.0111	1284.46	976.966	966.644	1125.55			89.0111	0.979896	0.826136	0.972393	0.976145
90.0111	1287.4	975.165	967.476	1127.44			90.0111	0.982145	0.824613	0.97323	0.977688
91.0111	1283.9	975.837	968.553	1126.23			91.0111	0.979476	0.825182	0.974314	0.976895
92.0121	1281.32	978.491	967.691	1124.51			92.0121	0.977506	0.827426	0.973447	0.975477
93.0111	1283.14	976.781	966.305	1124.72			93.0111	0.978891	0.82598	0.972053	0.975472
94.0111	1285.76	973.841	964.855	1125.31			94.0111	0.98089	0.823494	0.970593	0.975742
95.0111	1281.96	976.231	966.979	1124.47			95.0111	0.977989	0.825515	0.97273	0.975359
96.0111	1277.81	977.609	964.308	1121.06			96.0111	0.974827	0.82668	0.970044	0.972435
97.0112	1282.48	972.726	968.733	1125.61			97.0112	0.978389	0.822551	0.974495	0.976442
98.0111	1282.66	972.546	969.934	1126.3			98.0111	0.978527	0.822398	0.975703	0.977115
99.0112	1278.2	972.652	968.918	1123.56			99.0112	0.975122	0.822489	0.974681	0.974902
100.011	1279.18	975.561	969.475	1124.33			100.011	0.975874	0.824948	0.975241	0.975558
101.012	1277.96	976.527	967.093	1122.53			101.012	0.974945	0.825765	0.972845	0.973895
102.011	1281.45	976.326	968.415	1124.93			102.011	0.977602	0.825595	0.974175	0.975888
103.011	1275.36	971.658	968.058	1121.71			103.011	0.972958	0.821648	0.973816	0.973387
104.011	1279.68	975.355	963.586	1121.63			104.011	0.976255	0.824774	0.969317	0.972786
105.011	1279.13	981.552	962.839	1120.98			105.011	0.975834	0.830014	0.968566	0.9722
106.011	1279.21	972.91	961.719	1120.46			106.011	0.975893	0.822707	0.967439	0.971666
107.011	1279.91	976.151	970.297	1125.1			107.011	0.976429	0.825447	0.976068	0.976248
108.011	1281.78	977.687	964.399	1123.09			108.011	0.977857	0.826746	0.970134	0.973996
109.011	1282.7	974.573	968.346	1125.52			109.011	0.978553	0.824113	0.974106	0.97633
110.012	1281.78	972.564	964.084	1122.93			110.012	0.977853	0.822414	0.969818	0.973835
111.011	1281.21	976.489	964.029	1122.62			111.011	0.977424	0.825733	0.969762	0.973593
112.012	1282.28	974.853	959.452	1120.87			112.012	0.978235	0.824349	0.965159	0.971697
113.012	1280.13	973.611	961.568	1120.85			113.012	0.9766	0.8233	0.967287	0.971943
114.011	1283.41	978.226	966.531	1124.97			114.011	0.979103	0.827202	0.97228	0.975691
115.011	1279.01	974.561	964.253	1121.63			115.011	0.975742	0.824102	0.969988	0.972865
116.011	1278.05	974.248	968.079	1123.07			116.011	0.975012	0.823837	0.973837	0.974424
117.011	1280.46	973.981	966.054	1123.26			117.011	0.97685	0.823612	0.9718	0.974325
118.011	1277.17	971.285	966.643	1121.91			118.011	0.974342	0.821332	0.972393	0.973367
119.011	1275.39	970.507	963.381	1119.39			119.011	0.97298	0.820675	0.969111	0.971046
120.092	1279.65	972.051	965.661	1122.66			120.092	0.976232	0.82198	0.971404	0.973818
121.016	1274.89	969.351	960.338	1117.62			121.016	0.972601	0.819697	0.966049	0.969325
122.041	1279.82	976.477	964.652	1122.24			122.041	0.97636	0.825723	0.970389	0.973375
123.07	1275.29	976.713	962.61	1118.95			123.07	0.972902	0.825922	0.968335	0.970618
124.088	1277.48	974.457	962.365	1119.92			124.088	0.974579	0.824014	0.968088	0.971333
125.011	1275.69	975.125	958.444	1117.07			125.011	0.973211	0.82458	0.964144	0.968678
126.011	1276.06	973.513	961.833	1118.95			126.011	0.973492	0.823217	0.967553	0.970522
127.006	1275.66	973.391	958.391	1117.03			127.006	0.97319	0.823113	0.964091	0.968641
128.011	1275.54	970.371	962.052	1118.79			128.011	0.973093	0.820559	0.967774	0.970434
129.011	1270.55	974.27	958.743	1114.65			129.011	0.96929	0.823856	0.964445	0.966867
130.011	1272.87	973.206	965.615	1119.24			130.011	0.971056	0.822957	0.971358	0.971207
131.011	1267.88	971.796	963.786	1115.83			131.011	0.967251	0.821764	0.969519	0.968385
132.011	1271.86	972.779	963.078	1117.47			132.011	0.970285	0.822596	0.968806	0.969546
133.011	1273.16	971.766	957.115	1115.14			133.011	0.971279	0.821739	0.962807	0.967043
134.012	1276.94	972.571	958.147	1117.54			134.012	0.974159	0.822419	0.963846	0.969003
135.011	1271.76	968.118	954.689	1113.22			135.011	0.970207	0.818654	0.960367	0.965287
136.011	1268.87	971.545	955.735	1112.3			136.011	0.968008	0.821552	0.961419	0.964714
137.011	1280.28	971.277	958.566	1119.42			137.011	0.976711	0.821326	0.964267	0.970489
138.011	1275.13	968.093	959.563	1117.35			138.011	0.972784	0.818633	0.96527	0.969027
139.011	1274.97	973.215	957.024	1116			139.011	0.972664	0.822965	0.962716	0.96769
140.012	1279.1	972.985	953.639	1116.37			140.012	0.975807	0.82277	0.95931	0.967559
141.011	1268.48	971.727	952.252	1110.37			141.011	0.967711	0.821706	0.957916	0.962813
142.011	1268.8	971.611	950.473	1109.64			142.011	0.967953	0.821608	0.956127	0.96204
143.006	1276.21	971.281	953.156	1114.68			143.006	0.973604	0.821329	0.958825	0.966214
144.011	1267.82	967.647	955.45	1111.63			144.011	0.967203	0.818256	0.961132	0.964168
145.012	1270.59	968.15	955.035	1112.81			145.012	0.969317	0.818682	0.960715	0.965016
146.012	1271.94	969.773	951.64	1111.79			146.012	0.97035	0.820054	0.9573	0.963825
147.011	1272.55	965.913	950.374	1111.46			147.011	0.970814	0.81679	0.956027	0.96342
148.011	1276.16	967.441	953.014	1114.59			148.011	0.973568	0.818082	0.958682	0.966125
149.011	1271.25	965.846	955.158	1113.21			149.011	0.969824	0.816733	0.960839	0.965331
150.011	1274.73	965.102	952.653	1113.69			150.011	0.972479	0.816104	0.958319	0.965399
151.006	1273.66	966.395	948.01	1110.84			151.006	0.971664	0.817197	0.953649	0.962657
152.011	1273.11	970.662	949.507	1111.31			152.011	0.971241	0.820806	0.955154	0.963198
153.011	1276.56	968.237	953.005	1114.78			153.011	0.973869	0.818755	0.958674	0.966271
154.012	1271.32	964.162	947.43	1109.37			154.012	0.969872	0.815309	0.953065	0.961468
155.012	1268.47	963.942	947.958	1108.22			155.012	0.967705	0.815123	0.953596	0.960651
156.011	1267.38	962.745	948.404	1107.89			156.011	0.966866	0.814111	0.954045	0.960456
157.012	1268.78	961.337	950.692	1109.74			157.012	0.967938	0.81292	0.956347	0.962142
158.222	1262.87	960.585	949.227	1106.05			158.222	0.963431	0.812284	0.954872	0.959152
159.059	1269.75	961.645	951.701	1110.72			159.059	0.968674	0.813181	0.957361	0.963018
160.081	1273.57	965.837	949.782	1111.67			160.081	0.97159	0.816726	0.955431	0.963511
161.107	1267.65	964.322	949.191	1108.42			161.107	0.967076	0.815445	0.954837	0.960956
162.135	1260.08	965.263	950.643	1105.36			162.135	0.961299	0.81624	0.956297	0.958798
163.06	1262.16	963.494	948.857	1105.51			163.06	0.962891	0.814744	0.954501	0.958696
164.083	1267.1	958.743	950.599	1108.85			164.083	0.966654	0.810726	0.956253	0.961453
165.109	1263.21	958.557	947.938	1105.57			165.109	0.963687	0.81057	0.953576	0.958631
166.137	1261.02	962.331	946.727	1103.87			166.137	0.962016	0.813761	0.952358	0.957187
167.063	1259.19	960.946	945.863	1102.53			167.063	0.96062	0.81259	0.951489	0.956054
168.087	1257.59	959.908	944.596	1101.09			168.087	0.959403	0.811712	0.950215	0.954809
169.112	1260.09	957.94	942.221	1101.15			169.112	0.961306	0.810048	0.947825	0.954566
170.14	1260.53	959.708	946.859	1103.69			170.14	0.96164	0.811543	0.95249	0.957065
171.067	1258.99	964.591	948.451	1103.72			171.067	0.960465	0.815672	0.954092	0.957279
172.089	1251.67	964.521	943.224	1097.45			172.089	0.954885	0.815612	0.948834	0.951859
173.115	1252.24	958.744	948.923	1100.58			173.115	0.955321	0.810728	0.954567	0.954944

## Sheet: 100 uM ATP (-luciferase)
RAW DATA							NORMALIZED
time (s)	trial 1	trial 2	trial 3	mean			time (s)	trial 1	trial 2	trial 3	mean
0	1399.06	1354.76	1331.58	1361.8			0	0.999696	1	0.994858	0.998185
1.04562	1397.49	1353.39	1338.46	1363.11			1.04562	0.998573	0.998994	1	0.999189
2.07076	1392.44	1351.81	1336.71	1360.32			2.07076	0.994966	0.997826	0.998694	0.997162
3.09866	1392.7	1350.89	1327.53	1357.04			3.09866	0.995152	0.997147	0.991838	0.994712
4.03843	1384.42	1343.83	1335.51	1354.58			4.03843	0.989235	0.99193	0.997794	0.992987
5.06217	1390.32	1348.47	1329.46	1356.08			5.06217	0.993453	0.995359	0.993274	0.994029
6.08798	1394.36	1352.72	1332.99	1360.03			6.08798	0.996342	0.9985	0.995915	0.996919
7.11495	1395.62	1350.03	1333.49	1359.71			7.11495	0.99724	0.99651	0.996289	0.99668
8.04163	1386.11	1343.35	1331.4	1353.62			8.04163	0.990441	0.991576	0.994729	0.992249
9.06631	1387.95	1350.22	1331.42	1356.53			9.06631	0.991758	0.996653	0.994738	0.994383
10.0937	1395.22	1350.49	1335.98	1360.56			10.0937	0.996952	0.99685	0.998147	0.997317
11.1213	1396.84	1347.17	1333.35	1359.12			11.1213	0.998114	0.994398	0.996178	0.99623
12.0472	1392.64	1342.28	1332.86	1355.93			12.0472	0.995112	0.990788	0.995818	0.993906
13.0716	1387.87	1347.48	1334.51	1356.62			13.0716	0.991702	0.994626	0.997047	0.994459
14.0962	1393.2	1344.53	1323.8	1353.84			14.0962	0.995509	0.992449	0.989043	0.992334
15.1243	1390.57	1345.54	1327.81	1354.64			15.1243	0.99363	0.993193	0.992041	0.992955
16.0511	1394.25	1340.78	1324.92	1353.31			16.0511	0.996258	0.989685	0.989882	0.991941
17.0729	1399.48	1314.77	1328.22	1347.49			17.0729	1	0.970485	0.992346	0.98761
18.0983	1373.53	1302.69	1331.58	1335.93			18.0983	0.981452	0.961569	0.994856	0.979292
19.0385	1365.56	1287.93	1333.33	1328.94			19.0385	0.975762	0.950674	0.996169	0.974202
20.067	1344.92	1275.25	1335.75	1318.64			20.067	0.961009	0.941314	0.997973	0.966765
21.0902	1336.42	1273.5	1330.45	1313.46			21.0902	0.954939	0.940024	0.994019	0.962994
22.1105	1332.61	1267.45	1329.64	1309.9			22.1105	0.95222	0.935557	0.993412	0.960396
23.0384	1328.61	1264.7	1323.72	1305.68			23.0384	0.949356	0.933523	0.988989	0.95729
24.066	1318.07	1261.37	1324.33	1301.26			24.066	0.94183	0.931069	0.989439	0.954113
25.084	1320.57	1258.83	1321.55	1300.32			25.084	0.943615	0.929194	0.98737	0.953393
26.1103	1311.39	1254.34	1320.37	1295.37			26.1103	0.937055	0.92588	0.986484	0.949806
27.0384	1311.82	1258.48	1320.04	1296.78			27.0384	0.937361	0.928932	0.986238	0.950844
28.0667	1313.51	1252.58	1312.81	1292.97			28.0667	0.938568	0.924581	0.980836	0.947995
29.0892	1311.89	1253	1307.2	1290.7			29.0892	0.937413	0.924889	0.976647	0.946316
30.115	1306.74	1248.29	1312.2	1289.08			30.115	0.933729	0.921412	0.980379	0.945173
31.041	1308.95	1252.79	1307.83	1289.86			31.041	0.93531	0.924734	0.977114	0.945719
32.1059	1307.97	1249.5	1309.92	1289.13			32.1059	0.934613	0.922305	0.978679	0.945199
33.0384	1306.27	1248.49	1310.25	1288.34			33.0384	0.933393	0.921558	0.978924	0.944625
34.0384	1298.42	1246.37	1310.42	1285.07			34.0384	0.927784	0.919993	0.979054	0.942277
35.0384	1299.46	1245.41	1309.55	1284.81			35.0384	0.928527	0.919286	0.978401	0.942071
36.0384	1294.22	1235.65	1307.51	1279.13			36.0384	0.924783	0.912086	0.976878	0.937916
37.0384	1289.57	1237.36	1303.18	1276.7			37.0384	0.921458	0.913346	0.973645	0.93615
38.0384	1293.01	1236.54	1301.69	1277.08			38.0384	0.92392	0.912739	0.972526	0.936395
39.0384	1294.38	1226.61	1296.73	1272.57			39.0384	0.924895	0.905406	0.968826	0.933042
40.0384	1292.61	1225.02	1292.78	1270.14			40.0384	0.923632	0.904237	0.965871	0.931247
41.0334	1289.08	1230.22	1291.37	1270.22			41.0334	0.921112	0.908076	0.964814	0.931334
42.0384	1289.58	1221.17	1288.64	1266.46			42.0384	0.921466	0.901392	0.962782	0.928546
43.0384	1283.27	1220.27	1281.54	1261.69			43.0384	0.916959	0.900729	0.957474	0.925054
44.0384	1279.54	1217.64	1282.95	1260.04			44.0384	0.914297	0.898786	0.958525	0.923869
45.0384	1276.67	1214.31	1278.14	1256.37			45.0384	0.912246	0.89633	0.954931	0.921169
46.0384	1277.36	1219.77	1283.84	1260.32			46.0384	0.912739	0.900359	0.959188	0.924095
47.0374	1277.13	1220.04	1279.52	1258.9			47.0374	0.912573	0.900563	0.955966	0.923034
48.0384	1278.32	1214.6	1273.27	1255.39			48.0384	0.91342	0.896541	0.951291	0.920417
49.0384	1270.88	1216.8	1267.86	1251.85			49.0384	0.908109	0.898166	0.947253	0.917843
50.0384	1266.33	1207.97	1262.89	1245.73			50.0384	0.904858	0.89165	0.943541	0.91335
51.0384	1268.23	1206.61	1257.35	1244.06			51.0384	0.906212	0.890643	0.939401	0.912085
52.0384	1264.92	1211.2	1252.27	1242.8			52.0384	0.903852	0.894035	0.935603	0.911163
53.0384	1264.67	1202.09	1245.67	1237.48			53.0384	0.90367	0.887308	0.930672	0.907217
54.0384	1264.44	1200.55	1247.12	1237.37			54.0384	0.903507	0.886172	0.931761	0.907147
55.0384	1271.13	1205.89	1247.58	1241.53			55.0384	0.908284	0.890119	0.932097	0.910167
56.0384	1263.07	1210.27	1249.69	1241.01			56.0384	0.902525	0.893346	0.933681	0.909851
57.0384	1259.21	1201.45	1244.41	1235.02			57.0384	0.899768	0.886836	0.929733	0.905446
58.0384	1260.37	1198.03	1240.68	1233.03			58.0384	0.900597	0.884317	0.926946	0.903953
59.0384	1256.51	1192.32	1242.34	1230.39			59.0384	0.897837	0.880097	0.928182	0.902039
60.0384	1253.2	1195.21	1236.95	1228.46			60.0384	0.895477	0.882235	0.924157	0.900623
61.0384	1254.27	1189.75	1232.03	1225.35			61.0384	0.896238	0.8782	0.920485	0.898308
62.0384	1252.89	1194.58	1229.14	1225.54			62.0384	0.895254	0.881769	0.918322	0.898448
63.0384	1251.07	1193.37	1224.46	1222.97			63.0384	0.89395	0.880875	0.914826	0.89655
64.0384	1246.03	1189.61	1219.3	1218.31			64.0384	0.890351	0.878096	0.910969	0.893138
65.0384	1246.55	1188.83	1220.56	1218.65			65.0384	0.890724	0.877522	0.911914	0.893387
66.0384	1240.74	1182.46	1222.11	1215.1			66.0384	0.886569	0.87282	0.913068	0.890819
67.0384	1242.11	1184.42	1220.33	1215.62			67.0384	0.887551	0.874265	0.91174	0.891186
68.0384	1237.81	1183.13	1217.33	1212.75			68.0384	0.884473	0.873317	0.909497	0.889096
69.0384	1233.56	1185.44	1207.48	1208.83			69.0384	0.88144	0.87502	0.902141	0.8862
70.0384	1234.77	1184.05	1208.75	1209.19			70.0384	0.882303	0.873994	0.903092	0.886463
71.0384	1235.09	1182.05	1207.5	1208.21			71.0384	0.882532	0.87252	0.902152	0.885735
72.0384	1232.4	1179.75	1209.58	1207.24			72.0384	0.880609	0.87082	0.903712	0.885047
73.0384	1230.31	1180.97	1207.54	1206.27			73.0384	0.879118	0.871719	0.902184	0.88434
74.0384	1230.57	1174.39	1203.38	1202.78			74.0384	0.879305	0.866867	0.89908	0.881751
75.0384	1236.88	1178.89	1205.47	1207.08			75.0384	0.883814	0.870185	0.90064	0.88488
76.0384	1229.37	1177.39	1204.83	1203.86			76.0384	0.878444	0.869076	0.900161	0.882561
77.0334	1227.14	1170.84	1200.56	1199.51			77.0334	0.876856	0.864241	0.896971	0.879356
78.0384	1224.97	1167.73	1199.26	1197.32			78.0384	0.875302	0.861949	0.896002	0.877751
79.0324	1224.16	1165.31	1203.47	1197.65			79.0324	0.874727	0.860159	0.899143	0.87801
80.0384	1224.99	1166.57	1195.03	1195.53			80.0384	0.875315	0.86109	0.892836	0.876413
81.0384	1221.01	1169.93	1193.68	1194.87			81.0384	0.872473	0.86357	0.891831	0.875958
82.0384	1221.01	1162.8	1196.97	1193.59			82.0384	0.872471	0.85831	0.894291	0.875024
83.0384	1220.73	1167.41	1195.61	1194.58			83.0384	0.872269	0.861711	0.893271	0.87575
84.0394	1220.41	1165.94	1193.8	1193.38			84.0394	0.872044	0.860625	0.891924	0.874864
85.0384	1218.05	1167.37	1194.64	1193.35			85.0384	0.870356	0.86168	0.89255	0.874862
86.0384	1214.13	1169.35	1185.02	1189.5			86.0384	0.867555	0.863143	0.885363	0.87202
87.0384	1211.57	1169.55	1188.66	1189.93			87.0384	0.865727	0.863293	0.88808	0.872367
88.0384	1211.74	1169.14	1192.56	1191.15			88.0384	0.865847	0.862992	0.890992	0.873277
89.0384	1214.89	1166.13	1187.04	1189.36			89.0384	0.868101	0.860767	0.886872	0.871913
90.0384	1216.1	1164.38	1187.88	1189.46			90.0384	0.868964	0.859479	0.887499	0.871981
91.0384	1213.63	1164.3	1190.06	1189.33			91.0384	0.867197	0.859418	0.889124	0.871913
92.0384	1210.51	1162.71	1187.22	1186.81			92.0384	0.864968	0.858242	0.887006	0.870072
93.0384	1212.51	1166.36	1181.38	1186.75			93.0384	0.866399	0.860933	0.882641	0.869991
94.0384	1208.54	1159.8	1181.48	1183.27			94.0384	0.86356	0.856096	0.882718	0.867458
95.0384	1202.54	1153.59	1180.01	1178.71			95.0384	0.859273	0.851508	0.881621	0.864134
96.0384	1207.63	1154.4	1169.57	1177.2			96.0384	0.862912	0.852108	0.873814	0.862945
97.0384	1201.43	1155.62	1170.99	1176.01			97.0384	0.858485	0.853005	0.874879	0.862123
98.0384	1202.08	1154.35	1178.86	1178.43			98.0384	0.858944	0.852069	0.880757	0.863923
99.0384	1200.37	1157.53	1175.05	1177.65			99.0384	0.857724	0.854422	0.877912	0.863353
100.038	1203.52	1153.45	1169.45	1175.47			100.038	0.859973	0.851411	0.873726	0.861703
101.038	1200	1154.35	1170.53	1174.96			101.038	0.857458	0.852071	0.874531	0.861354
102.038	1201.38	1148.45	1168.43	1172.75			102.038	0.858442	0.847718	0.872964	0.859708
103.038	1206.04	1150.75	1164.62	1173.8			103.038	0.861774	0.849414	0.870116	0.860435
104.038	1200.92	1147.89	1162.18	1170.33			104.038	0.858115	0.847301	0.868298	0.857905
105.038	1202.54	1149.14	1158.93	1170.2			105.038	0.859273	0.848226	0.86587	0.85779
106.038	1201.28	1155.2	1157.1	1171.19			106.038	0.858371	0.852701	0.864497	0.858523
107.038	1196.55	1152.05	1157.52	1168.7			107.038	0.854993	0.850374	0.864813	0.856726
108.038	1194.13	1151.23	1153.28	1166.21			108.038	0.853267	0.849766	0.861651	0.854895
109.038	1192.32	1150.78	1155.98	1166.36			109.038	0.851974	0.849438	0.863662	0.855025
110.038	1190.43	1151.78	1154.57	1165.6			110.038	0.850622	0.850176	0.862613	0.85447
111.033	1191.49	1146.57	1149.45	1162.5			111.033	0.851383	0.846329	0.858784	0.852165
112.063	1189.85	1145.55	1146.25	1160.55			112.063	0.850204	0.845576	0.856393	0.850724
113.088	1192.56	1148.31	1147.16	1162.68			113.088	0.852145	0.847611	0.857073	0.852276
114.113	1186.72	1148.05	1143.23	1159.33			114.113	0.847969	0.847423	0.854138	0.849843
115.039	1189.65	1142.48	1146.28	1159.47			115.039	0.850064	0.84331	0.856413	0.849929
116.038	1187.73	1144.69	1146.32	1159.58			116.038	0.848689	0.844941	0.856445	0.850025
117.033	1187.61	1142.65	1148.31	1159.53			117.033	0.848608	0.843437	0.857934	0.849993
118.038	1182.04	1145.96	1144.79	1157.59			118.038	0.844623	0.845876	0.8553	0.8486
119.038	1184.54	1144.55	1147	1158.7			119.038	0.846411	0.844838	0.856957	0.849402
120.038	1176.59	1141.35	1141.93	1153.29			120.038	0.840732	0.842474	0.853171	0.845459
121.038	1175.88	1144.35	1139.13	1153.12			121.038	0.840225	0.844692	0.851077	0.845331
122.038	1177.85	1141.93	1142.34	1154.04			122.038	0.841629	0.8429	0.85347	0.846
123.038	1181.31	1137.98	1142.09	1153.79			123.038	0.844103	0.839988	0.853287	0.845793
124.038	1179.59	1138.46	1130.46	1149.5			124.038	0.842876	0.840344	0.844598	0.842606
125.038	1180.34	1138.08	1132.03	1150.15			125.038	0.843414	0.840062	0.845772	0.843083
126.038	1179.77	1144.11	1130.17	1151.35			126.038	0.843004	0.844515	0.844381	0.843967
127.038	1181.98	1136.84	1133.76	1150.86			127.038	0.844582	0.839146	0.847059	0.843596
128.038	1180.88	1135.4	1127.79	1148.02			128.038	0.843799	0.838087	0.842601	0.841496
129.038	1178.69	1131.15	1134.07	1147.97			129.038	0.842235	0.834946	0.847297	0.841493
130.038	1176.8	1132.75	1131.81	1147.12			130.038	0.840882	0.836127	0.845606	0.840872
131.038	1175.24	1134.36	1127.31	1145.64			131.038	0.839769	0.837314	0.842242	0.839775
132.038	1174.72	1131.77	1121.05	1142.51			132.038	0.839392	0.835406	0.837571	0.837456
133.038	1169.51	1134.8	1125.45	1143.25			133.038	0.835677	0.837641	0.840854	0.838057
134.038	1172.36	1135.55	1125.31	1144.41			134.038	0.837708	0.838198	0.840748	0.838885
135.038	1174.94	1136.8	1123.24	1144.99			135.038	0.839553	0.839117	0.839201	0.839291
136.038	1177.68	1133.92	1121.79	1144.46			136.038	0.841511	0.836991	0.838122	0.838875
137.038	1171.59	1129.97	1120.72	1140.76			137.038	0.837161	0.834077	0.837319	0.836186
138.038	1170.03	1127.19	1120.04	1139.09			138.038	0.836045	0.832023	0.836814	0.834961
139.038	1165.09	1127.3	1117.34	1136.58			139.038	0.832511	0.832105	0.834797	0.833138
140.038	1172.61	1127.76	1117.64	1139.34			140.038	0.83789	0.832446	0.835021	0.835119
141.038	1174.63	1123.18	1116.34	1138.05			141.038	0.839332	0.829064	0.834052	0.834149
142.038	1166.85	1131.23	1117.13	1138.4			142.038	0.833772	0.835004	0.834638	0.834471
143.038	1170.4	1129.21	1117.81	1139.14			143.038	0.836307	0.833513	0.835146	0.834989
144.038	1166.05	1126.42	1114.19	1135.55			144.038	0.833201	0.831453	0.83244	0.832365
145.038	1163.17	1130.8	1113.25	1135.74			145.038	0.831143	0.834686	0.831741	0.832524
146.038	1162.7	1131.33	1110.44	1134.82			146.038	0.830804	0.835079	0.829642	0.831842
147.038	1162.4	1124.16	1110.33	1132.3			147.038	0.830595	0.829789	0.829558	0.82998
148.038	1159.84	1125.53	1108.98	1131.45			148.038	0.828767	0.830796	0.828549	0.829371
149.038	1158.84	1123.47	1110.93	1131.08			149.038	0.828049	0.829278	0.830004	0.82911
150.038	1162.55	1120.97	1107.45	1130.33			150.038	0.8307	0.827432	0.82741	0.828514
151.038	1160.57	1123.65	1109.24	1131.15			151.038	0.829282	0.829409	0.828742	0.829144
152.038	1157.35	1126.81	1108.43	1130.86			152.038	0.826986	0.831745	0.828135	0.828955
153.081	1165.29	1123.85	1102.98	1130.7			153.081	0.83266	0.829554	0.824065	0.82876
154.094	1158.66	1121.21	1102.31	1127.4			154.094	0.827922	0.827611	0.823568	0.826367
155.123	1156.04	1116.68	1099.79	1124.17			155.123	0.826046	0.824269	0.821681	0.823999
156.049	1156.76	1118.97	1098.45	1124.73			156.049	0.826563	0.825958	0.820686	0.824402
157.072	1161.49	1115.55	1101.69	1126.24			157.072	0.829941	0.823433	0.823105	0.825493
158.093	1151.49	1118.76	1105.81	1125.35			158.093	0.822797	0.825801	0.826179	0.824926
159.122	1151.9	1118.14	1097.63	1122.56			159.122	0.823094	0.825345	0.820067	0.822835
160.047	1154.32	1119.26	1100.69	1124.76			160.047	0.824817	0.826168	0.822359	0.824448
161.071	1150.82	1117.88	1104.15	1124.28			161.071	0.822318	0.825151	0.824941	0.824137
162.096	1152.74	1109.7	1098.78	1120.41			162.096	0.823692	0.819115	0.820925	0.821244
163.125	1149.83	1110.23	1096.12	1118.73			163.125	0.821609	0.819506	0.818943	0.82002
164.051	1150.55	1105.14	1095.49	1117.06			164.051	0.822122	0.815749	0.818474	0.818782
165.073	1153.95	1110.64	1092.16	1118.92			165.073	0.824553	0.819809	0.815986	0.820116
166.099	1150.11	1110.8	1094.36	1118.42			166.099	0.821813	0.819925	0.817628	0.819789
167.127	1139.96	1110.4	1093.14	1114.5			167.127	0.814558	0.81963	0.816718	0.816969
168.052	1144.96	1108.31	1092.87	1115.38			168.052	0.818129	0.818087	0.816509	0.817575
169.076	1148.8	1109.51	1086.26	1114.85			169.076	0.820873	0.818969	0.811571	0.817138
170.101	1140.04	1102.74	1088.93	1110.57			170.101	0.814614	0.813976	0.813569	0.814053
171.038	1147.35	1107.34	1091.48	1115.39			171.038	0.819839	0.817375	0.815475	0.817563
172.066	1143.85	1103.48	1087.98	1111.77			172.066	0.817334	0.814526	0.81286	0.814907
173.088	1142.4	1100.27	1089	1110.55			173.088	0.8163	0.812151	0.813618	0.814023
